# Supplementary material
Source: PubMed Central journal article supplement (PMC3911239)
Supplement: JB.01034-13_zjb999092985so1.pdf [file JB.01034-13_zjb999092985so1.pdf]

## Supplementary material

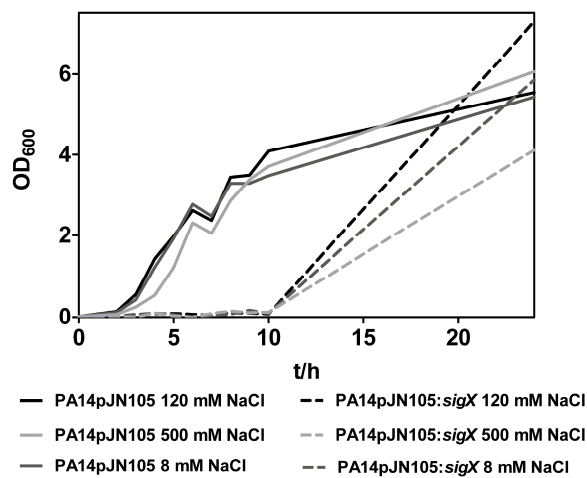

**FIG S1** Growth curves of PA14 wild-type (PA14:pJN105) and PA14 overexpressing *sigX* (PA14:pJN105-RBS-*sigX*). Strains were cultivated at 37°C in LB with different concentrations of NaCl. We assume that in the wild-type expression of *sigX* is a highly fine-tuned process and that both, deletion and overexpression of *sigX*, creates stress conditions that significantly impact on bacterial fitness.

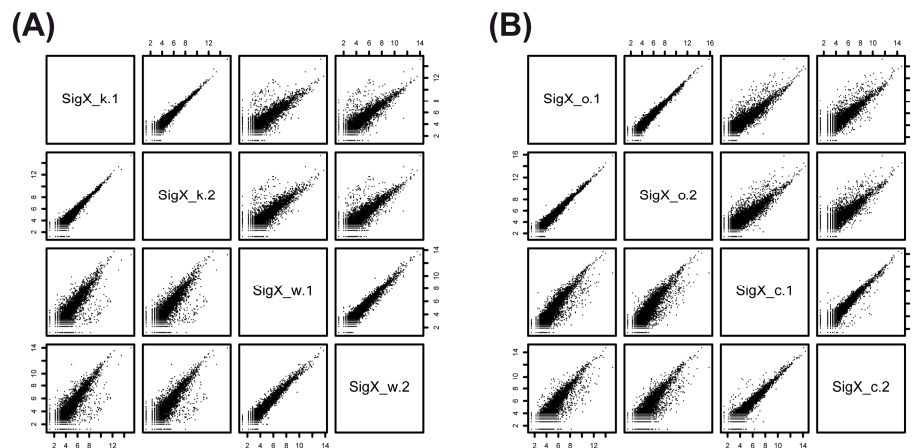

**FIG S2** Scatter plots of the variance-stabilized expression data compared against each other. Illustrations of both replicates of (A) the *sigX* mutant strain (SigX\_k) and the wild-type strain (SigX\_w) and (B) for the *sigX* overexpressing strain (SigX\_o) and the empty vector control strain (SigX\_c). These plots clearly demonstrate that the corresponding replicates are significantly more similar in comparison to other samples.

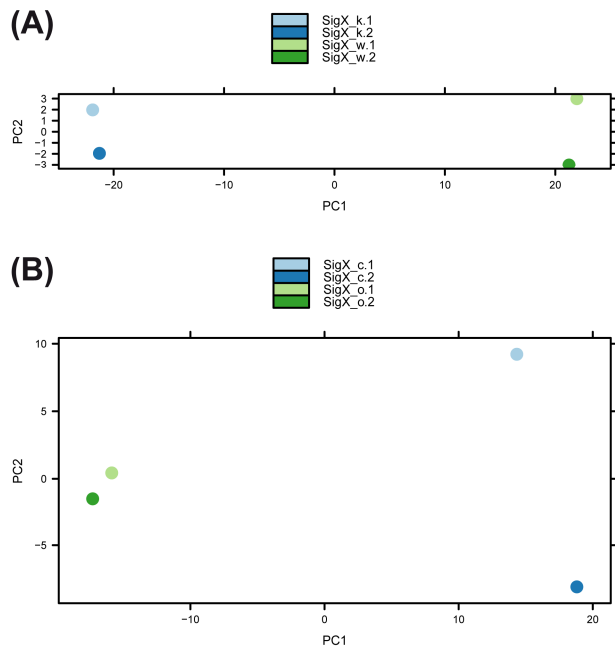

**FIG S3** 2D principal component analysis plot based on the top 100 variable genes of both replicates of (A) the *sigX* mutant strain (SigX\_k) and the wild-type strain (SigX\_w) and (B) for the *sigX* overexpressing strain (SigX\_o) and the empty vector control strain (SigX\_c). In both cases, the replicates from the same strain cluster together, while different strains form distinct clusters. The separation between the condition clusters is clearly larger comparing to those between the replicates.

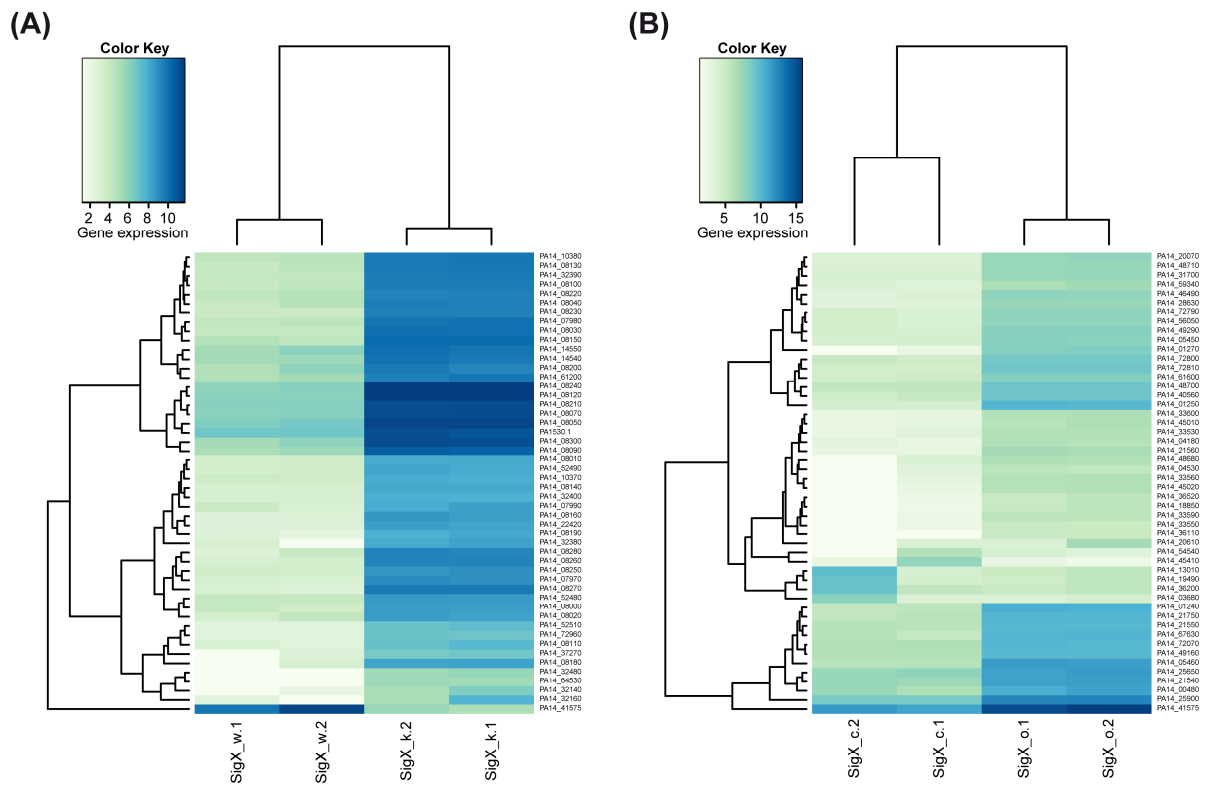

**FIG S4** Heatmaps of the top 50 genes with the highest variance of gene expression. Illustrations of both replicates of (A) the *sigX* mutant strain (SigX\_k) and the wild-type strain (SigX\_w) and (B) for the *sigX* overexpressing strain (SigX\_o) and the empty vector control strain (SigX\_c). A proper separation between case and control samples is confirmed.

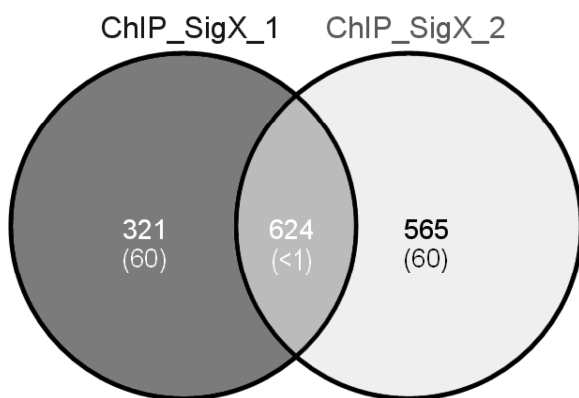

**FIG S5** Venn diagram showing the number of genes bound in each ChIP-seq replicate. The number of false-positives is indicated in parenthesis. 624 of maximal 6014 genes were hit in both replicates, 1510 genes were hit at least in one replicate and 5390 genes were not hit at all according to the cut-off values  $p\text{-value} \leq 0.01$  and enrichment factor  $\geq 3$ .

**TABLE S1** Primers used in this study. Engineered restriction sites are underlined.

| Primer (engineered restriction site)                | Sequence (5'→3')                                                                   | Function                           |
|-----------------------------------------------------|------------------------------------------------------------------------------------|------------------------------------|
| sigX-FW ( <i>EcoRI</i> )                            | ACTGGAATTCTTAACTTTAAGGA<br>GGAGATATAATGAATAAGCCTCA<br>CCCCCTGTC                    | RNA-and ChIP-seq experiments       |
| sigX-RV ( <i>XbaI</i> )                             | ACTGTCTAGATCATGTTTCGGTC<br>GCATCTGAAAAC                                            | RNA-seq experiments                |
| sigX-His8-RV ( <i>XbaI</i> )                        | ACTGTCTAGATCAGTGGTGGTGG<br>TGGTGGTGGTGGTGGTCCAGTG<br>TTTCGGTCGCATCTGAAAAC          | octahistidine-tagging and ChIP     |
| PsigX-FW ( <i>BamHI</i> )                           | AGATCAGGATCCTCCTGGCGCA<br>ACTGGTGA                                                 | bioluminescence assay              |
| PsigX-RV ( <i>XmaI</i> )                            | AGATCACCCGGGGTGAGATCAG<br>GCCAGTCATATCGTAA                                         | bioluminescence assay              |
| PaccB-FW ( <i>BamHI</i> )                           | AGTCGGATCCCATCATCAAT<br>CCGGCG                                                     | bioluminescence assay              |
| PaccB-RV ( <i>EcoRI</i> )                           | AGTCGAATTCGTTTGTGCACGTT<br>CGACAGG                                                 | bioluminescence assay              |
| PcheY2-FW ( <i>SpeI</i> )                           | ACTGACTAGTGGAAATTGTTCTGA<br>GGGGTATCGA                                             | bioluminescence assay              |
| PcheY2-RV ( <i>HindIII</i> )                        | ACTGAAGCTTGGTCTTGCGTCCT<br>CACGGT                                                  | bioluminescence assay              |
| iPCRpEX18AP-CW ( <i>EcoRV</i> )                     | ATCGGATATCGCTAGCGCGGCC<br>GCACGCGTGGTACCGGATCCGA<br>ATTCGCCAGCTGCATTAATGAAT<br>CGG | inverse PCR to construct pEX18TAp2 |
| iPCRpEX18AP-ACW ( <i>EcoRV</i> )                    | ATCGGATATCCTCGAGCTGCAGC<br>CCGGGTCTAGAGAGCTCAAGCT<br>TTCAAATATGCGCCTGATGCG         | inverse PCR to construct pEX18TAp2 |
| Mut-sigX-up-FW ( <i>BamHI</i> )                     | ATCGGGATCCCAACTGGTGAACA<br>GCGTCGTG                                                | mutagenesis                        |
| Mut-sigX-up-RV ( <i>KpnI</i> )                      | CAGTCAGTCAGGTACCGTGAGAT<br>CAGGCCAGTCATATCGT                                       | mutagenesis                        |
| Mut-sigX-down-FW ( <i>KpnI</i> )                    | GGTACCTGACTGACTGATTGGGT<br>AAATATTGTCTCTATGCGG                                     | mutagenesis                        |
| Mut-sigX-down-RV ( <i>NotI</i> )                    | ATCGGCGGCCGCGTGGCCGTGG<br>ACCTTCTTGT                                               | mutagenesis                        |
| FRT-Gm-FRT-FW ( <i>KpnI</i> )                       | GTCAGGGTACCACGATCGAATTG<br>GGGATCTTG                                               | mutagenesis                        |
| FRT-Gm-FRT-RV ( <i>KpnI</i> )                       | GTCAGGGTACCTGCATGATCGAA<br>TTAGCTTCAAAG                                            | mutagenesis                        |
| T7-promoter-Bpml-(dA) <sub>15</sub> ( <i>Bpml</i> ) | CGAAATTAATACGACTCACTATA<br>GGGCTGGAGAAAAAAAAAAAAA<br>A                             | ChIP-seq experiments               |
| T7-promoter-Bpml-(dA) <sub>18</sub> ( <i>Bpml</i> ) | CGAAATTAATACGACTCACTATA<br>GGGCTGGAGAAAAAAAAAAAAA<br>AAAA                          | ChIP-seq experiments               |

Table S2: Down-regulated genes comparing PA14Δs/gX:Gm<sup>r</sup> vs. PA14 WT

| PA14 ID    | gene name* | expression<br>log2FC | p-value**<br>(FDR) | Product name                                                    | PseudoCAP category***                                                                                              |
|------------|------------|----------------------|--------------------|-----------------------------------------------------------------|--------------------------------------------------------------------------------------------------------------------|
| PA14_21020 | 0          | -3.540               | 0.000              | putative non-ribosomal peptide synthetase                       | Biosynthesis of cofactors, prosthetic groups and carriers; Adaptation / Protection                                 |
| PA14_36310 | hcnC       | -3.451               | 0.000              | hydrogen cyanide synthase HcnC                                  | Central intermediary metabolism                                                                                    |
| PA14_36320 | hcnB       | -3.424               | 0.000              | hydrogen cyanide synthase HcnB                                  | Central intermediary metabolism                                                                                    |
| PA14_09470 | phzB1      | -4.520               | 0.000              | probable phenazine biosynthesis protein                         | Secreted factors (toxins, enzymes, alginate)                                                                       |
| PA14_68340 | arcB       | -2.592               | 0.000              | ornithine carbamoyltransferase, catabolic                       | Amino acid biosynthesis and metabolism                                                                             |
| PA1555.1   | ccoQ1      | -2.769               | 0.000              | 0                                                               | Non-coding RNA gene (sRNA)                                                                                         |
| PA14_20970 | cyp23      | -3.562               | 0.000              | cytochrome P450                                                 | Adaptation / Protection; Carbon compound catabolism                                                                |
| PA14_68360 | 0          | -2.842               | 0.000              | putative beta-ketoacyl synthase                                 | Fatty acid and phospholipid metabolism                                                                             |
| PA14_22910 | edd        | -2.473               | 0.000              | 6-phosphogluconate dehydratase                                  | Energy metabolism; Carbon compound catabolism                                                                      |
| PA14_51410 | pqsC       | -2.149               | 0.000              | PqsC                                                            | Biosynthesis of cofactors, prosthetic groups and carriers                                                          |
| PA14_25650 | fabD       | -2.595               | 0.000              | matonyl-CoA-[acyl-carrier-protein] transacylase                 | Fatty acid and phospholipid metabolism                                                                             |
| PA14_10540 | fixG*      | -1.974               | 0.000              | putative iron-sulfur cluster-binding protein                    | Energy metabolism; Putative enzymes                                                                                |
| PA14_21000 | 0          | -3.079               | 0.000              | hypothetical protein                                            | Hypothetical, unclassified or unknown                                                                              |
| PA14_60700 | ccpR       | -2.445               | 0.000              | cytochrome c551 peroxidase                                      | Energy metabolism                                                                                                  |
| PA14_51420 | pqsB       | -1.874               | 0.000              | PqsB                                                            | Biosynthesis of cofactors, prosthetic groups and carriers                                                          |
| PA14_05360 | 0          | -2.187               | 0.000              | conserved hypothetical protein                                  | Hypothetical, unclassified or unknown                                                                              |
| PA14_21030 | 0          | -1.961               | 0.000              | putative ATP-dependent Clp protease proteolytic subunit         | Translation, post-translational modification and degradation; Cell wall / LPS / capsule                            |
| PA14_50280 | flaG*      | -2.703               | 0.000              | hypothetical protein                                            | Hypothetical, unclassified or unknown                                                                              |
| PA14_51390 | pqsD       | -1.844               | 0.000              | 3-oxoacyl-[acyl-carrier-protein] synthase III                   | Biosynthesis of cofactors, prosthetic groups and carriers                                                          |
| PA14_23070 | zwf        | -1.988               | 0.000              | glucose-6-phosphate 1-dehydrogenase                             | Energy metabolism; Carbon compound catabolism                                                                      |
| PA14_43030 | 0          | -3.109               | 0.000              | conserved hypothetical protein                                  | Protein secretion / Export apparatus                                                                               |
| PA14_51430 | pqsA       | -1.826               | 0.000              | probable coenzyme A ligase                                      | Biosynthesis of cofactors, prosthetic groups and carriers                                                          |
| PA14_71820 | yegQ*      | -2.372               | 0.000              | putative peptidase                                              | Translational, post-translational modification and degradation; Putative enzymes                                   |
| PA14_44300 | aer        | -2.146               | 0.000              | aerolaxis receptor Aer                                          | Adaptation / Protection; Chemotaxis                                                                                |
| PA14_02020 | 0          | -3.147               | 0.000              | putative outer membrane porin                                   | Membrane proteins; Transport of small molecules                                                                    |
| PA14_42450 | popB       | -3.194               | 0.000              | translocator protein PopB                                       | Protein secretion / Export apparatus                                                                               |
| PA14_64940 | 0          | -2.684               | 0.000              | putative icotinic acid mononucleotide adenylyltransferase       | Biosynthesis of cofactors, prosthetic groups and carriers                                                          |
| PA14_17960 | glpK       | -2.052               | 0.000              | glycerol kinase                                                 | Central intermediary metabolism                                                                                    |
| PA14_39960 | phz2E      | -3.764               | 0.000              | probable phenazine biosynthesis protein                         | Secreted factors (toxins, enzymes, alginate)                                                                       |
| PA14_51360 | phzA       | -1.771               | 0.000              | anthranilate synthase component I                               | Adaptation / Protection                                                                                            |
| PA14_17250 | yaaJ*      | -2.157               | 0.000              | putative Na <sup>+</sup> /alanine symporter                     | Transport of small molecules                                                                                       |
| PA14_21010 | 0          | -3.272               | 0.000              | putative FAD-dependent monooxygenase                            | Energy metabolism; Putative enzymes                                                                                |
| PA14_69130 | glpT       | -2.261               | 0.000              | glycerol-3-phosphate transporter                                | Membrane proteins; Transport of small molecules                                                                    |
| PA14_61780 | rplY*      | -1.602               | 0.000              | putative ribosomal protein L25                                  | Adaptation / Protection; Translation, post-translational modification and degradation                              |
| PA14_41590 | cmpX*      | -2.075               | 0.000              | putative cytoplasmic membrane protein                           | Membrane proteins                                                                                                  |
| PA14_32790 | 0          | -1.702               | 0.000              | hypothetical protein                                            | Hypothetical, unclassified or unknown                                                                              |
| PA14_50290 | flc        | -1.684               | 0.000              | flagellin type B                                                | Motility / Attachment                                                                                              |
| PA14_20950 | fabH2      | -2.542               | 0.000              | 3-oxoacyl-[acyl-carrier-protein] synthase III                   | Fatty acid and phospholipid metabolism                                                                             |
| PA14_00570 | 0          | -4.135               | 0.000              | putative lipoprotein                                            | Cell wall / LPS / capsule                                                                                          |
| PA14_25900 | 0          | -1.783               | 0.000              | putative short-chain alcohol dehydrogenase                      | Putative enzymes; Protein secretion / Export apparatus; Motility / Attachment                                      |
| PA14_44340 | ccoN*      | -2.318               | 0.000              | putative cytochrome oxidase subunit (ccb3-type)                 | Energy metabolism                                                                                                  |
| PA14_20960 | 0          | -3.343               | 0.000              | putativ isomerase                                               | Putative enzymes                                                                                                   |
| PA14_08720 | rplK       | -1.539               | 0.000              | 50S ribosomal protein L11                                       | Translation, post-translational modification and degradation                                                       |
| PA14_57020 | groES      | -1.502               | 0.000              | Hsp10 protein                                                   | Chaperones / Heat shock proteins                                                                                   |
| PA14_25660 | fabG       | -1.625               | 0.000              | 3-oxoacyl-[acyl-carrier-protein] reductase                      | Fatty acid and phospholipid metabolism                                                                             |
| PA14_43690 | fabB       | -1.623               | 0.000              | beta-ketoacyl-ACP synthase I                                    | Fatty acid and phospholipid metabolism                                                                             |
| PA14_55960 | pctC       | -2.173               | 0.000              | chemotactic transducer PctC                                     | Adaptation / Protection; Chemotaxis                                                                                |
| PA14_23330 | rpsA       | -1.470               | 0.000              | 30S ribosomal protein S1                                        | Translation, post-translational modification and degradation                                                       |
| PA14_22890 | ggsA       | -2.532               | 0.000              | glyceroldehyde-3-phosphate dehydrogenase                        | Energy metabolism; Carbon compound catabolism                                                                      |
| PA14_68350 | arcC       | -2.958               | 0.000              | carbamate kinase                                                | Amino acid biosynthesis and metabolism                                                                             |
| PA14_10500 | ccoN*      | -1.565               | 0.000              | cytochrome c oxidase subunit (ccb3-type)                        | Energy metabolism                                                                                                  |
| PA14_72690 | 0          | -2.504               | 0.000              | putative glutamine synthetase                                   | Amino acid biosynthesis and metabolism; Putative enzymes; Carbon compound catabolism                               |
| PA14_67560 | typA       | -1.672               | 0.000              | GTP-binding protein TypA/BtpA                                   | Adaptation / Protection                                                                                            |
| PA14_15070 | oprC       | -1.961               | 0.000              | outer membrane copper receptor OprC                             | Transport of small molecules                                                                                       |
| PA14_44350 | ccoQ*      | -2.469               | 0.000              | putative cytochrome c oxidase subunit                           | Energy metabolism                                                                                                  |
| PA14_54170 | puaA       | -1.838               | 0.000              | proline dehydrogenase PuaA                                      | Amino acid biosynthesis and metabolism                                                                             |
| PA14_17060 | rpsB       | -1.446               | 0.000              | 30S ribosomal subunit protein S2                                | Translation, post-translational modification and degradation                                                       |
| PA14_62970 | dnaK       | -1.469               | 0.000              | putative heat shock protein                                     | DNA replication, recombination, modification and repair; Adaptation / Protection; Chaperones / Heat shock proteins |
| PA14_66660 | pilM       | -1.557               | 0.000              | type 4 fimbrial biogenesis protein PilM                         | Motility / Attachment                                                                                              |
| PA14_25030 | 0          | -2.401               | 0.000              | conserved hypothetical protein                                  | Hypothetical, unclassified or unknown                                                                              |
| PA14_54040 | 0          | -1.818               | 0.000              | probable amino acid permease                                    | Membrane proteins; Transport of small molecules                                                                    |
| PA14_11270 | accA       | -1.543               | 0.000              | acetyl-CoA carboxylase, carboxyl transferase, alpha subunit     | Fatty acid and phospholipid metabolism                                                                             |
| PA14_09460 | phzC1      | -5.141               | 0.000              | phenazine biosynthesis protein PhzC                             | Secreted factors (toxins, enzymes, alginate)                                                                       |
| PA14_64110 | accC       | -1.596               | 0.000              | biotin carboxylase                                              | Fatty acid and phospholipid metabolism                                                                             |
| PA14_56010 | pctB       | -1.976               | 0.000              | chemotactic transducer PctB                                     | Adaptation / Protection; Chemotaxis                                                                                |
| PA14_08860 | rplD       | -1.376               | 0.000              | 50S ribosomal protein L4                                        | Transcription, RNA processing and degradation; Translation, post-translational modification and degradation        |
| PA14_42980 | 0          | -3.404               | 0.000              | putative ClpA/B-type protease                                   | Chaperones / Heat shock proteins; Putative enzymes; Protein secretion / Export apparatus                           |
| PA14_62770 | nusA       | -1.360               | 0.000              | N utilization substance protein A                               | Transcription, RNA processing and degradation                                                                      |
| PA14_72710 | 0          | -2.382               | 0.000              | putative amino acid transporter                                 | Membrane proteins; Transport of small molecules                                                                    |
| PA14_72660 | 0          | -2.314               | 0.000              | putative amidase                                                | Biosynthesis of cofactors, prosthetic groups and carriers                                                          |
| PA14_08960 | rplX       | -1.305               | 0.000              | 50S ribosomal protein L24                                       | Translation, post-translational modification and degradation                                                       |
| PA14_24290 | glt        | -1.974               | 0.000              | glycine betaine transmethylase                                  | Amino acid biosynthesis and metabolism                                                                             |
| PA14_43850 | htpG       | -1.704               | 0.000              | heat shock protein HtpG                                         | Chaperones / Heat shock proteins                                                                                   |
| PA14_20940 | 0          | -3.180               | 0.000              | putative acyl carrier protein                                   | Fatty acid and phospholipid metabolism                                                                             |
| PA14_20980 | 0          | -2.881               | 0.000              | putative short chain dehydrogenase                              | Putative enzymes                                                                                                   |
| PA14_00090 | glyS       | -1.568               | 0.000              | glycyl-tRNA synthetase beta chain                               | Amino acid biosynthesis and metabolism; Translation, post-translational modification and degradation               |
| PA14_18250 | fruI       | -2.159               | 0.000              | putative phosphotransferase system, fructose-specific component | Central intermediary metabolism; Transport of small molecules                                                      |
| PA14_66790 | hslU       | -1.789               | 0.000              | heat shock protein HslU                                         | Chaperones / Heat shock proteins                                                                                   |
| PA14_73300 | atpE       | -1.315               | 0.000              | atp synthase C chain                                            | Energy metabolism                                                                                                  |
| PA14_49470 | nrdB       | -1.486               | 0.000              | ribonucleoside reductase, small chain                           | Nucleotide biosynthesis and metabolism                                                                             |
| PA14_59970 | 0          | -1.723               | 0.000              | conserved hypothetical protein                                  | Hypothetical, unclassified or unknown                                                                              |
| PA14_57010 | groEL      | -1.224               | 0.000              | GroEL protein                                                   | Chaperones / Heat shock proteins                                                                                   |
| PA14_08780 | rpoC       | -1.211               | 0.000              | DNA-directed RNA polymerase beta' chain                         | Transcription, RNA processing and degradation                                                                      |
| PA14_16530 | lysS       | -1.518               | 0.000              | lysyl-tRNA synthetase                                           | Amino acid biosynthesis and metabolism; Translation, post-translational modification and degradation               |
| PA14_08740 | rplJ       | -1.360               | 0.001              | 50S ribosomal protein L10                                       | Translation, post-translational modification and degradation                                                       |
| PA14_15350 | 0          | -1.439               | 0.001              | putative integrase                                              | Related to phage, transposon or plasmid                                                                            |
| PA14_51380 | pqsE       | -1.387               | 0.001              | Quinolone signal response protein                               | Biosynthesis of cofactors, prosthetic groups and carriers                                                          |
| PA14_73240 | atpD       | -1.196               | 0.001              | ATP synthase beta chain                                         | Energy metabolism                                                                                                  |
| PA14_64050 | 0          | -1.520               | 0.001              | putative two-component response regulator                       | Transcriptional regulators; Two-component regulatory systems                                                       |
| PA14_08680 | tufB       | -1.188               | 0.001              | elongation factor Tu                                            | Translation, post-translational modification and degradation                                                       |
| PA14_62840 | glmM       | -1.312               | 0.001              | phosphoglucosamine mutase                                       | Cell wall / LPS / capsule                                                                                          |
| PA14_08830 | tufA       | -1.185               | 0.001              | elongation factor Tu                                            | Translation, post-translational modification and degradation                                                       |

|            |        |          |       |                                                          |                                                                                                                    |
|------------|--------|----------|-------|----------------------------------------------------------|--------------------------------------------------------------------------------------------------------------------|
| PA14_08940 | rpsQ   | -1.269   | 0.001 | 30S ribosomal protein S17                                | Translation, post-translational modification and degradation                                                       |
| PA14_16180 | 0      | -1.469   | 0.001 | conserved hypothetical protein                           | Hypothetical, unclassified or unknown                                                                              |
| PA14_42440 | popD   | -2.856   | 0.001 | translocator outer membrane protein PopD precursor       | Protein secretion / Export apparatus                                                                               |
| PA14_08850 | rlpC   | -1.207   | 0.001 | 50S ribosomal protein L3                                 | Translation, post-translational modification and degradation                                                       |
| PA14_08820 | fusaA1 | -1.153   | 0.001 | elongation factor G                                      | Translation, post-translational modification and degradation                                                       |
| PA14_66710 | rpmE   | -1.322   | 0.001 | 50S ribosomal protein L31                                | Translation, post-translational modification and degradation                                                       |
| PA14_51570 | 0      | -1.694   | 0.001 | hypothetical protein                                     | Hypothetical, unclassified or unknown                                                                              |
| PA14_43020 | 0      | -3.962   | 0.001 | conserved hypothetical protein                           | Protein secretion / Export apparatus                                                                               |
| PA14_73280 | atpH   | -1.267   | 0.001 | ATP synthase delta chain                                 | Energy metabolism                                                                                                  |
| PA14_01490 | 0      | -1.737   | 0.001 | putative hemolysin                                       | Putative enzymes; Adaptation / Protection                                                                          |
| PA14_49160 | yegE*  | -1.985   | 0.001 | conserved hypothetical protein                           | Membrane proteins                                                                                                  |
| PA14_20920 | 0      | -2.469   | 0.001 | hypothetical protein                                     | Hypothetical, unclassified or unknown                                                                              |
| PA14_71650 | aspA   | -1.208   | 0.001 | aspartate ammonia-lyase                                  | Amino acid biosynthesis and metabolism                                                                             |
| PA14_23080 | pgj    | -2.122   | 0.002 | 6-phosphogluconolactonase                                | Central intermediary metabolism                                                                                    |
| PA14_09400 | phzS   | -3.734   | 0.002 | flavin-containing monooxygenase                          | Putative enzymes                                                                                                   |
| PA14_68200 | rmlA   | -1.500   | 0.002 | glucose-1-phosphate thymidyltransferase                  | Cell wall / LPS / capsule                                                                                          |
| PA14_09440 | phzE1  | -3.633   | 0.002 | phenazine biosynthesis protein PhzE                      | Secreted factors (toxins, enzymes, alginate)                                                                       |
| PA14_42570 | pscN   | -2.891   | 0.002 | ATP synthase in type III secretion system                | Protein secretion / Export apparatus                                                                               |
| PA14_17070 | tsf    | -1.669   | 0.002 | translation elongation factor Ts                         | Translation, post-translational modification and degradation                                                       |
| PA14_27210 | efp    | -1.182   | 0.002 | translation elongation factor P                          | Translation, post-translational modification and degradation                                                       |
| PA14_07090 | metK   | -1.453   | 0.002 | methionine adenosyltransferase                           | Antibiotic resistance and susceptibility; Amino acid biosynthesis and metabolism; Central intermediary metabolism  |
| PA14_58730 | piA    | -1.070   | 0.002 | type IV pilin structural subunit                         | Motility / Attachment                                                                                              |
| PA14_43000 | 0      | -2.348   | 0.002 | conserved hypothetical protein                           | Protein secretion / Export apparatus                                                                               |
| PA14_39890 | phzF2  | -999.000 | 0.002 | probable phenazine biosynthesis protein                  | Secreted factors (toxins, enzymes, alginate)                                                                       |
| PA14_19110 | rhlB   | -2.240   | 0.002 | rhamnopyranose transferase chain B                       | Secreted factors (toxins, enzymes, alginate)                                                                       |
| PA14_20900 | 0      | -3.875   | 0.003 | putative MFS transporter                                 | Membrane proteins; Transport of small molecules                                                                    |
| PA14_50250 | flhS   | -1.416   | 0.003 | hypothetical protein                                     | Hypothetical, unclassified or unknown                                                                              |
| PA14_43040 | 0      | -2.113   | 0.003 | conserved hypothetical protein                           | Protein secretion / Export apparatus                                                                               |
| PA14_25670 | acpP   | -1.088   | 0.003 | acyl carrier protein                                     | Fatty acid and phospholipid metabolism                                                                             |
| PA14_36330 | hcnA   | -3.244   | 0.003 | hydrogen cyanide synthase HcnA                           | Central intermediary metabolism                                                                                    |
| PA14_09450 | phzD1  | -999.000 | 0.003 | phenazine biosynthesis protein PhzD                      | Secreted factors (toxins, enzymes, alginate)                                                                       |
| PA14_58320 | 0      | -1.260   | 0.003 | putative two-component sensor                            | Two-component regulatory systems                                                                                   |
| PA14_20750 | 0      | -1.145   | 0.003 | putative chemotaxis signal transduction protein          | Adaptation / Protection; Chemotaxis                                                                                |
| PA14_07520 | rpoD   | -1.054   | 0.003 | sigma factor RpoD                                        | Transcription, RNA processing and degradation; Transcriptional regulators                                          |
| PA14_42400 | exxB   | -3.577   | 0.003 | exoenzyme S synthesis protein B                          | Translation, post-translational modification and degradation; Protein secretion / Export apparatus                 |
| PA14_60130 | 0      | -1.656   | 0.004 | conserved hypothetical protein                           | Hypothetical, unclassified or unknown                                                                              |
| PA14_08560 | tyrZ   | -1.195   | 0.004 | tyrosyl-tRNA synthetase 2                                | Amino acid biosynthesis and metabolism; Translation, post-translational modification and degradation               |
| PA14_09280 | pchF   | -2.658   | 0.004 | pyochelin synthetase PchF                                | Secreted factors (toxins, enzymes, alginate); Transport of small molecules                                         |
| PA14_16820 | 0      | -1.881   | 0.004 | putative efflux transmembrane protein                    | Antibiotic resistance and susceptibility; Membrane proteins; Transport of small molecules                          |
| PA14_07530 | dnaC   | -1.233   | 0.004 | putative DNA primase                                     | DNA replication, recombination, modification and repair                                                            |
| PA14_39910 | phzE2  | -4.907   | 0.004 | phenazine biosynthesis protein PhzE                      | Secreted factors (toxins, enzymes, alginate)                                                                       |
| PA14_50240 | 0      | -1.872   | 0.004 | hypothetical protein                                     | Hypothetical, unclassified or unknown                                                                              |
| PA14_62490 | dksA   | -1.080   | 0.004 | suppressor protein DksA                                  | Transcriptional regulators; Adaptation / Protection; DNA replication, recombination, modification and repair       |
| PA14_09130 | rlpQ   | -1.065   | 0.004 | 50S ribosomal protein L17                                | Translation, post-translational modification and degradation                                                       |
| PA14_08810 | rpsG   | -1.155   | 0.004 | 30S ribosomal protein S7                                 | Translation, post-translational modification and degradation                                                       |
| PA14_09010 | rlpR   | -1.084   | 0.004 | 50S ribosomal protein L18                                | Translation, post-translational modification and degradation                                                       |
| PA14_40560 | 0      | -3.041   | 0.004 | conserved hypothetical protein                           | Hypothetical, unclassified or unknown                                                                              |
| PA14_23090 | edaA*  | -1.751   | 0.004 | 2-keto-3-deoxy-6-phosphogluconate aldolase               | Central intermediary metabolism; Carbon compound catabolism                                                        |
| PA14_60460 | rlpU   | -1.083   | 0.005 | ribosomal protein L21                                    | Translation, post-translational modification and degradation                                                       |
| PA14_04710 | 0      | -2.195   | 0.005 | hypothetical protein                                     | Hypothetical, unclassified or unknown                                                                              |
| PA14_19100 | rhlA   | -1.887   | 0.005 | rhamnopyranose transferase chain A                       | Secreted factors (toxins, enzymes, alginate)                                                                       |
| PA14_57580 | rpsI   | -1.077   | 0.005 | ribosomal protein S9                                     | Translation, post-translational modification and degradation                                                       |
| PA14_58300 | 0      | -1.386   | 0.005 | putative DNA-binding response regulator                  | Transcriptional regulators; Two-component regulatory systems                                                       |
| PA14_73260 | atpA   | -1.036   | 0.005 | ATP synthase alpha chain                                 | Energy metabolism                                                                                                  |
| PA14_10530 | 0      | -1.772   | 0.006 | putative transcriptional regulator, GntR family          | Transcriptional regulators                                                                                         |
| PA14_08730 | rlpA   | -1.644   | 0.006 | 50S ribosomal protein L1                                 | Translation, post-translational modification and degradation                                                       |
| PA14_61790 | pth    | -1.409   | 0.006 | peptidyl-tRNA hydrolase                                  | Translation, post-translational modification and degradation                                                       |
| PA14_62960 | dnaJ   | -1.129   | 0.006 | chaperone protein DnaJ                                   | DNA replication, recombination, modification and repair; Chaperones / Heat shock proteins; Adaptation / Protection |
| PA14_05620 | sahH   | -1.158   | 0.006 | S-adenosyl-L-homocysteine hydrolase                      | Central intermediary metabolism; Amino acid biosynthesis and metabolism                                            |
| PA14_16000 | rlpS   | -1.840   | 0.006 | 50S ribosomal protein L19                                | Translation, post-translational modification and degradation                                                       |
| PA14_68210 | rmlC   | -1.546   | 0.006 | dTDP-4-dehydroharnose 3,5-epimerase                      | Cell wall / LPS / capsule                                                                                          |
| PA14_09000 | rlpF   | -1.028   | 0.006 | 50S ribosomal protein L6                                 | Translation, post-translational modification and degradation                                                       |
| PA14_09530 | mexH   | -2.614   | 0.006 | RND efflux membrane fusion protein precursor             | Transport of small molecules                                                                                       |
| PA14_24300 | 0      | -2.278   | 0.007 | conserved hypothetical protein                           | Hypothetical, unclassified or unknown                                                                              |
| PA14_13290 | 0      | -2.159   | 0.007 | putative protease                                        | Translation, post-translational modification and degradation; Putative enzymes                                     |
| PA14_72650 | 0      | -2.142   | 0.007 | putative transcriptional regulator                       | Transcriptional regulators                                                                                         |
| PA14_43050 | 0      | -1.650   | 0.007 | conserved hypothetical protein                           | Protein secretion / Export apparatus                                                                               |
| PA14_05080 | metX   | -1.768   | 0.007 | homoserine O-acetyltransferase                           | Amino acid biosynthesis and metabolism                                                                             |
| PA14_39945 | phzC2  | -3.141   | 0.007 | phenazine biosynthesis protein PhzC                      | Hypothetical, unclassified or unknown                                                                              |
| PA14_45940 | lasI   | -1.049   | 0.007 | autoinducer synthesis protein LasI                       | Adaptation / Protection                                                                                            |
| PA14_56060 | purU   | -1.251   | 0.008 | formyltetrahydrofolate deformylase                       | Nucleotide biosynthesis and metabolism                                                                             |
| PA14_73310 | atpB   | -1.006   | 0.008 | ATP synthase A chain                                     | Energy metabolism                                                                                                  |
| PA14_42860 | 0      | -1.068   | 0.008 | putative hemerythrin                                     | Transport of small molecules                                                                                       |
| PA14_00580 | 0      | -3.792   | 0.008 | putative lipoprotein                                     | Fatty acid and phospholipid metabolism                                                                             |
| PA14_54150 | putP   | -1.181   | 0.008 | sodium/proline symporter PutP                            | Membrane proteins; Transport of small molecules                                                                    |
| PA14_08990 | rpsH   | -1.047   | 0.008 | 30S ribosomal protein S8                                 | Translation, post-translational modification and degradation                                                       |
| PA14_60800 | 0      | -1.066   | 0.008 | putative ABC transporter, ATP-binding protein            | Transport of small molecules                                                                                       |
| PA14_50270 | flhD   | -1.284   | 0.008 | flagellar capping protein FlhD                           | Cell wall / LPS / capsule; Motility / Attachment                                                                   |
| PA14_03370 | 0      | -1.603   | 0.008 | conserved hypothetical protein                           | Hypothetical, unclassified or unknown                                                                              |
| PA14_61820 | yhcF*  | -1.326   | 0.009 | putative GTP-binding protein                             | Translation, post-translational modification and degradation                                                       |
| PA14_17930 | glpD   | -1.816   | 0.009 | glycerol-3-phosphate dehydrogenase                       | Central intermediary metabolism; Energy metabolism                                                                 |
| PA14_15980 | rhlM   | -1.024   | 0.009 | 16S rRNA processing protein RhlM                         | Transcription, RNA processing and degradation                                                                      |
| PA14_57590 | rlpM   | -1.015   | 0.010 | ribosomal protein L13                                    | Translation, post-translational modification and degradation                                                       |
| PA14_51240 | purC   | -1.070   | 0.010 | phosphoribosylaminoimidazole-succinocarboxamide synthase | Nucleotide biosynthesis and metabolism                                                                             |
| PA14_17100 | frt    | -1.624   | 0.010 | ribosome recycling factor                                | Translation, post-translational modification and degradation                                                       |
| PA14_13750 | narK1  | -2.428   | 0.010 | putative nitrite extrusion protein                       | Membrane proteins; Transport of small molecules                                                                    |
| PA14_18010 | glpK*  | -1.599   | 0.010 | putative glycerol kinase                                 | Central intermediary metabolism; Putative enzymes                                                                  |
| PA14_66650 | pihN   | -1.328   | 0.010 | type 4 fimbrial biogenesis protein PIhN                  | Motility / Attachment                                                                                              |
| PA14_61250 | lysP   | -1.610   | 0.011 | APC family lysine-specific permease                      | Membrane proteins; Transport of small molecules                                                                    |
| PA14_13300 | 0      | -2.133   | 0.011 | putative peptidase                                       | Translation, post-translational modification and degradation                                                       |
| PA14_09420 | phzF1  | -3.466   | 0.011 | probable phenazine biosynthesis protein                  | Secreted factors (toxins, enzymes, alginate)                                                                       |
| PA14_62130 | livC   | -1.034   | 0.012 | ketol-acid reductoisomerase                              | Biosynthesis of cofactors, prosthetic groups and carriers; Amino acid biosynthesis and metabolism                  |
| PA14_23170 | glnS   | -1.288   | 0.012 | glucosamine-fructose-6-phosphate aminotransferase        | Central intermediary metabolism                                                                                    |
| PA14_41575 | sigX   | -5.663   | 0.013 | ECF sigma factor SigX                                    | Transcriptional regulators                                                                                         |
| PA14_42380 | exsD*  | -1.915   | 0.013 | conserved hypothetical protein                           | Hypothetical, unclassified or unknown                                                                              |

|            |        |        |       |                                                                                             |                                                                                                                                                  |
|------------|--------|--------|-------|---------------------------------------------------------------------------------------------|--------------------------------------------------------------------------------------------------------------------------------------------------|
| PA14_07130 | tkfA   | -1.060 | 0.014 | transketolase                                                                               | Carbon compound catabolism; Energy metabolism                                                                                                    |
| PA14_17630 | potB   | -4.659 | 0.014 | polyamine transport protein PotB                                                            | Membrane proteins; Transport of small molecules                                                                                                  |
| PA14_14630 | secD   | -1.001 | 0.015 | protein-export membrane protein SecD                                                        | Membrane proteins; Protein secretion / Export apparatus                                                                                          |
| PA14_03350 | 0      | -1.315 | 0.015 | Hypothetical protein                                                                        | Hypothetical, unclassified or unknown                                                                                                            |
| PA14_23560 | gltx   | -1.078 | 0.015 | glutamyl-IRNA synthetase                                                                    | Translation, post-translational modification and degradation                                                                                     |
| PA14_03330 | 0      | -1.835 | 0.015 | hypothetical protein                                                                        | Hypothetical, unclassified or unknown                                                                                                            |
| PA14_06650 | nirM   | -2.439 | 0.015 | putative c-type cytochrome                                                                  | Biosynthesis of cofactors, prosthetic groups and carriers; Energy metabolism                                                                     |
| PA14_69630 | paIP   | -1.477 | 0.015 | type 4 fimbrial biogenesis protein PIP                                                      | Motility / Attachment                                                                                                                            |
| PA14_36300 | 0      | -1.968 | 0.016 | putative transcriptional regulator, TetR family                                             | Transcriptional regulators                                                                                                                       |
| PA14_42430 | exsC   | -2.013 | 0.017 | Oxenzymase S synthesis protein C precursor                                                  | Secreted factors (toxins, enzymes, alginate); Translation, post-translational modification and degradation; Protein secretion / Export apparatus |
| PA14_51880 | oprD   | -1.619 | 0.017 | Basic amino acid, basic peptide and imipenem outer membrane porin OprD precursor            | Transport of small molecules                                                                                                                     |
| PA14_08750 | rplL   | -1.663 | 0.017 | S05 ribosomal protein L7 / L12                                                              | Translation, post-translational modification and degradation                                                                                     |
| PA14_14650 | secF   | -1.058 | 0.019 | protein-export membrane protein SecF                                                        | Protein secretion / Export apparatus                                                                                                             |
| PA14_60070 | 0      | -1.048 | 0.019 | conserved hypothetical protein                                                              | Hypothetical, unclassified or unknown                                                                                                            |
| PA14_58190 | galB   | -1.057 | 0.019 | Glu-IRNA(Gln) amidotransferase subunit B                                                    | Translation, post-translational modification and degradation                                                                                     |
| PA14_68170 | rmlB   | -1.197 | 0.019 | dTDP-D-glucose 4,6-dehydratase                                                              | Cell wall / LPS / capsule                                                                                                                        |
| PA14_61080 | dctP*  | -2.080 | 0.019 | putative C4-dicarboxylate-binding protein                                                   | Transport of small molecules                                                                                                                     |
| PA14_03610 | ycal*  | -1.745 | 0.020 | putative putative Zn-dependent protease with chaperone function                             | Chaperones / Heat shock proteins                                                                                                                 |
| PA14_15340 | guaA   | -1.005 | 0.020 | GMP synthase                                                                                | Amino acid biosynthesis and metabolism; Nucleotide biosynthesis and metabolism                                                                   |
| PA14_00060 | 0      | -1.350 | 0.022 | putative acyltransferase                                                                    | Fatty acid and phospholipid metabolism                                                                                                           |
| PA14_72700 | 0      | -1.660 | 0.022 | putative N-formylglutamate amidohydrolase                                                   | Biosynthesis of cofactors, prosthetic groups and carriers                                                                                        |
| PA14_68330 | arcA   | -2.408 | 0.023 | arginine deiminase                                                                          | Amino acid biosynthesis and metabolism                                                                                                           |
| PA14_62760 | infB   | -1.035 | 0.024 | translation initiation factor IF-2                                                          | Translation, post-translational modification and degradation                                                                                     |
| PA14_60490 | 0      | -1.019 | 0.025 | putative cytochrome c precursor                                                             | Energy metabolism                                                                                                                                |
| PA14_06740 | nirM   | -3.037 | 0.025 | cytochrome c-551 precursor                                                                  | Biosynthesis of cofactors, prosthetic groups and carriers; Energy metabolism                                                                     |
| PA14_04110 | serA   | -1.003 | 0.025 | D-3-phosphoglycerate dehydrogenase                                                          | Amino acid biosynthesis and metabolism                                                                                                           |
| PA14_09520 | mead   | -2.731 | 0.026 | probable RND efflux transporter                                                             | Membrane proteins; Transport of small molecules                                                                                                  |
| PA14_08370 | vfr    | -1.070 | 0.026 | cyclic AMP receptor-like protein                                                            | Transcriptional regulators                                                                                                                       |
| PA14_05530 | mexA   | -1.064 | 0.026 | RND multidrug efflux membrane fusion protein MexA precursor                                 | Transport of small molecules; Antibiotic resistance and susceptibility                                                                           |
| PA14_16330 | 0      | -1.139 | 0.026 | conserved hypothetical protein                                                              | Hypothetical, unclassified or unknown                                                                                                            |
| PA14_43110 | 0      | -1.167 | 0.027 | putative glutathione S-transferase                                                          | Central intermediary metabolism; Putative enzymes                                                                                                |
| PA14_52040 | purM   | -1.156 | 0.027 | phosphoribosylaminoimidazole synthetase                                                     | Nucleotide biosynthesis and metabolism                                                                                                           |
| PA14_42350 | pscC   | -2.401 | 0.027 | Type III secretion outer membrane protein PscC precursor                                    | Protein secretion / Export apparatus                                                                                                             |
| PA14_44360 | ccpA*  | -2.726 | 0.028 | putative cytochrome c oxidase, cbb3-type, subunit III                                       | Energy metabolism                                                                                                                                |
| PA14_65660 | parE   | -1.014 | 0.030 | topoisomerase IV subunit B                                                                  | DNA replication, recombination, modification and repair                                                                                          |
| PA14_03320 | 0      | -1.333 | 0.030 | Hypothetical protein                                                                        | Hypothetical, unclassified or unknown                                                                                                            |
| PA14_06670 | nirJ   | -2.115 | 0.030 | heme d1 biosynthesis protein NirJ                                                           | Biosynthesis of cofactors, prosthetic groups and carriers; Energy metabolism                                                                     |
| PA14_16430 | wspA   | -1.200 | 0.030 | putative methyl-accepting chemotaxis transducer                                             | Chemotaxis; Adaptation / Protection; Motility / Attachment                                                                                       |
| PA14_39925 | phzD2  | -4.043 | 0.033 | phenazine biosynthesis protein PhzD                                                         | Hypothetical, unclassified or unknown                                                                                                            |
| PA14_72630 | yejE*  | -1.365 | 0.033 | putative permease of ABC transporter                                                        | Membrane proteins; Transport of small molecules                                                                                                  |
| PA14_27000 | 0      | -1.111 | 0.034 | putative methyl-accepting chemotaxis protein                                                | Adaptation / Protection; Chemotaxis                                                                                                              |
| PA14_05550 | oprM   | -1.091 | 0.035 | major intrinsic multiple antibiotic resistance efflux outer membrane protein OprM precursor | Antibiotic resistance and susceptibility; Membrane proteins; Transport of small molecules                                                        |
| PA14_00480 | 0      | -1.190 | 0.035 | conserved hypothetical protein                                                              | Hypothetical, unclassified or unknown                                                                                                            |
| PA14_64950 | pncA   | -1.726 | 0.035 | nicotinamidase                                                                              | Central intermediary metabolism                                                                                                                  |
| PA14_69070 | yjhH*  | -1.148 | 0.036 | putative ATP-binding/permease fusion ABC transporter                                        | Membrane proteins; Transport of small molecules                                                                                                  |
| PA14_09150 | 0      | -1.823 | 0.036 | hypothetical protein                                                                        | Hypothetical, unclassified or unknown                                                                                                            |
| PA14_17820 | potC   | -4.108 | 0.036 | polyamine transport protein PotC                                                            | Membrane proteins; Transport of small molecules                                                                                                  |
| PA14_16790 | 0      | -1.445 | 0.036 | putative transcriptional regulator, tetR family                                             | Transcriptional regulators                                                                                                                       |
| PA14_42470 | pcrV   | -2.108 | 0.038 | type III secretion protein PcrV                                                             | Protein secretion / Export apparatus                                                                                                             |
| PA14_09480 | phzA1  | -4.238 | 0.038 | probable phenazine biosynthesis protein                                                     | Secreted factors (toxins, enzymes, alginate)                                                                                                     |
| PA14_70010 | 0      | -1.116 | 0.038 | putative endoribonuclease L-PSP family protein                                              | Translation, post-translational modification and degradation                                                                                     |
| PA14_16800 | 0      | -1.553 | 0.038 | putative efflux transmembrane protein                                                       | Transport of small molecules                                                                                                                     |
| PA14_69630 | rmlK   | -1.210 | 0.040 | nucleoside diphosphate kinase regulator                                                     | Transcriptional regulators                                                                                                                       |
| PA14_13740 | narX   | -1.425 | 0.041 | putative nitrate/nitrite sensor protein, NarX                                               | Energy metabolism; Two-component regulatory systems                                                                                              |
| PA14_00820 | 0      | -1.192 | 0.042 | conserved hypothetical protein                                                              | Hypothetical, unclassified or unknown                                                                                                            |
| PA14_17220 | lpxB   | -1.145 | 0.043 | lipid A-disaccharide synthase                                                               | Cell wall / LPS / capsule                                                                                                                        |
| PA14_09490 | phzM   | -1.755 | 0.043 | probable phenazine-specific methyltransferase                                               | Putative enzymes                                                                                                                                 |
| PA14_17980 | glpF   | -1.326 | 0.043 | glycerol uptake facilitator protein                                                         | Transport of small molecules                                                                                                                     |
| PA14_11690 | ppa    | -1.280 | 0.045 | PPase                                                                                       | Energy metabolism; Central intermediary metabolism                                                                                               |
| PA14_29770 | 0      | -2.408 | 0.045 | putative permease                                                                           | Membrane proteins; Transport of small molecules                                                                                                  |
| PA14_71890 | psecA* | -1.273 | 0.046 | putative coenzyme A transferase                                                             | Fatty acid and phospholipid metabolism; Putative enzymes                                                                                         |
| PA14_43130 | 0      | -1.066 | 0.047 | putative aminotransferase                                                                   | Transport of small molecules; Putative enzymes                                                                                                   |
| PA14_60350 | fkpB*  | -1.194 | 0.047 | probable peptidyl-prolyl cis-trans isomerase, FkpB-type                                     | Translation, post-translational modification and degradation; Chaperones / Heat shock proteins                                                   |
| PA14_68940 | 0      | -1.926 | 0.047 | hypothetical protein                                                                        | Hypothetical, unclassified or unknown                                                                                                            |
| PA14_39690 | nrdD*  | -2.102 | 0.048 | putative ribonucleotide reductase                                                           | Nucleotide biosynthesis and metabolism                                                                                                           |
| PA14_00210 | 0      | -1.034 | 0.049 | putative lysin domain                                                                       | Putative enzymes                                                                                                                                 |
| PA14_42310 | pscF   | -2.407 | 0.049 | type III export protein PscF                                                                | Protein secretion / Export apparatus                                                                                                             |
| PA14_36270 | 0      | -1.559 | 0.049 | putative 3-hydroxyisobutyrate dehydrogenase                                                 | Fatty acid and phospholipid metabolism; Putative enzymes                                                                                         |

\* alternative gene name was provided when no gene name was annotated

\*\* p-value calculated equals False-Discovery-Rate (FDR)

\*\*\* PseudoCAP annotation was updated as previously described (see Material & Methods)

\*\*\*\* values of 999.000 or -999.000 occur when DESeq returned 'inf' or '-inf' as a fold change due to no reads in one of the two corresponding samples

Table S2: Up-regulated genes comparing PA14:pJN105-RBS-sigX vs. PA14:pJN105

| PA14 ID    | gene name* | expression | log2FC | p-value** | Product name                                               | PseudoCAP category***                                                         |
|------------|------------|------------|--------|-----------|------------------------------------------------------------|-------------------------------------------------------------------------------|
| PA14_01250 | yehM*      | 6.33       | 6.33   | 0.000     | putative sulfate transporter                               | Membrane proteins; Transport of small molecules                               |
| PA14_05460 | bioA       | 5.43       | 5.43   | 0.000     | adenosylmethionine-8-amino-7-oxononanoate aminotransferase | Biosynthesis of cofactors, prosthetic groups and carriers                     |
| PA14_01240 | 0          | 5.06       | 5.06   | 0.000     | probable carbonic anhydrase                                | Adaptation / Protection; Central intermediary metabolism                      |
| PA14_01270 | 0          | 8.41       | 8.41   | 0.000     | conserved hypothetical protein                             | Hypothetical, unclassified or unknown                                         |
| PA14_67630 | 0          | 4.55       | 4.55   | 0.000     | putative small-conductance mechanosensitive channel        | Membrane proteins                                                             |
| PA14_21750 | 0          | 4.45       | 4.45   | 0.000     | putative acetyltransferase                                 | Fatty acid and phospholipid metabolism; Membrane proteins                     |
| PA14_72810 | 0          | 4.74       | 4.74   | 0.000     | putative acid-CoA thioester hydrolase                      | Fatty acid and phospholipid metabolism                                        |
| PA14_25900 | 0          | 3.85       | 3.85   | 0.000     | putative short-chain alcohol dehydrogenase                 | Putative enzymes; Protein secretion / Export apparatus; Motility / Attachment |
| PA14_21550 | 0          | 4.09       | 4.09   | 0.000     | putative sigma-70 factor, ECF subfamily                    | Transcriptional regulators                                                    |
| PA14_21540 | fabH-2*    | 3.85       | 3.85   | 0.000     | putative 3-oxoacyl-(acyl-carrier-protein) synthase III     | Fatty acid and phospholipid metabolism                                        |
| PA14_72800 | rosB*      | 4.08       | 4.08   | 0.000     | putative potassium efflux protein                          | Membrane proteins; Transport of small molecules                               |
| PA14_40560 | 0          | 4.26       | 4.26   | 0.000     | conserved hypothetical protein                             | Hypothetical, unclassified or unknown                                         |
| PA14_49160 | yegE*      | 3.68       | 3.68   | 0.000     | conserved hypothetical protein                             | Membrane proteins                                                             |
| PA14_72070 | 0          | 3.68       | 3.68   | 0.000     | conserved hypothetical protein                             | Hypothetical, unclassified or unknown                                         |
| PA14_49290 | 0          | 4.29       | 4.29   | 0.000     | conserved hypothetical protein                             | Membrane proteins                                                             |
| PA14_25660 | fabG       | 3.13       | 3.13   | 0.000     | 3-oxoacyl-(acyl-carrier-protein) reductase                 | Fatty acid and phospholipid metabolism                                        |
| PA14_46490 | fabF2      | 4.88       | 4.88   | 0.000     | 3-oxoacyl-acyl carrier protein synthase II                 | Fatty acid and phospholipid metabolism                                        |
| PA14_48700 | kefB       | 3.67       | 3.67   | 0.000     | glutathione-regulated potassium-efflux system protein KefB | Transport of small molecules                                                  |

|            |       |        |       |                                                                                             |                                                                                                                                                  |
|------------|-------|--------|-------|---------------------------------------------------------------------------------------------|--------------------------------------------------------------------------------------------------------------------------------------------------|
| PA14_23880 | folC  | 3.27   | 0.000 | folypolyglutamate synthetase                                                                | Biosynthesis of cofactors, prosthetic groups and carriers                                                                                        |
| PA14_05450 | 0     | 4.23   | 0.000 | conserved hypothetical protein                                                              | Hypothetical, unclassified or unknown                                                                                                            |
| PA14_28630 | 0     | 5.09   | 0.000 | putative hydrolase                                                                          | Putative enzymes                                                                                                                                 |
| PA14_51300 | perM* | 3.24   | 0.000 | conserved hypothetical protein                                                              | Membrane proteins                                                                                                                                |
| PA14_72790 | 0     | 4.08   | 0.000 | putative membrane protein                                                                   | Membrane proteins                                                                                                                                |
| PA14_20070 | 0     | 4.57   | 0.000 | putative membrane protein                                                                   | Membrane proteins                                                                                                                                |
| PA14_43690 | fabB  | 3.10   | 0.000 | beta-ketoacyl-ACP synthase I                                                                | Fatty acid and phospholipid metabolism                                                                                                           |
| PA14_21560 | 0     | 5.72   | 0.000 | hypothetical protein                                                                        | Hypothetical, unclassified or unknown                                                                                                            |
| PA14_56050 | 0     | 3.90   | 0.000 | putative membrane protein                                                                   | Membrane proteins                                                                                                                                |
| PA14_23860 | accD  | 2.90   | 0.000 | acetyl-CoA carboxylase beta subunit                                                         | Fatty acid and phospholipid metabolism                                                                                                           |
| PA14_64110 | accC  | 2.88   | 0.000 | biotin carboxylase                                                                          | Fatty acid and phospholipid metabolism                                                                                                           |
| PA14_31720 | 0     | 3.41   | 0.000 | putative lysophospholipase                                                                  | Fatty acid and phospholipid metabolism                                                                                                           |
| PA14_61600 | 0     | 3.70   | 0.000 | putative oxidoreductase                                                                     | Putative enzymes                                                                                                                                 |
| PA14_25650 | fabD  | 3.70   | 0.000 | malonyl-CoA:acyl-carrier-protein] transacylase                                              | Fatty acid and phospholipid metabolism                                                                                                           |
| PA14_48710 | 0     | 4.31   | 0.000 | conserved hypothetical protein                                                              | Hypothetical, unclassified or unknown                                                                                                            |
| PA14_00060 | 0     | 3.14   | 0.000 | putative acyltransferase                                                                    | Fatty acid and phospholipid metabolism                                                                                                           |
| PA14_23890 | 0     | 3.24   | 0.000 | putative DedD protein                                                                       | Cell division                                                                                                                                    |
| PA14_50740 | 0     | 3.05   | 0.000 | conserved hypothetical protein                                                              | Membrane proteins                                                                                                                                |
| PA14_43910 | 0     | 3.42   | 0.000 | conserved hypothetical protein                                                              | Membrane proteins                                                                                                                                |
| PA14_05920 | 0     | 3.34   | 0.000 | putative membrane protein                                                                   | Membrane proteins                                                                                                                                |
| PA14_31700 | pgsA* | 3.77   | 0.000 | CDP-alcohol phosphatidyltransferase                                                         | Fatty acid and phospholipid metabolism; Putative enzymes                                                                                         |
| PA14_57690 | 0     | 3.09   | 0.000 | conserved hypothetical protein                                                              | Hypothetical, unclassified or unknown                                                                                                            |
| PA14_17270 | accA  | 2.53   | 0.000 | acetyl-CoA carboxylase, carboxyl transferase, alpha subunit                                 | Fatty acid and phospholipid metabolism                                                                                                           |
| PA14_42350 | pscC  | 3.35   | 0.000 | Type III secretion outer membrane protein PscC precursor                                    | Protein secretion / Export apparatus                                                                                                             |
| PA14_42430 | exsC  | 4.79   | 0.000 | exoenzyme S synthesis protein C precursor                                                   | Secreted factors (toxins, enzymes, alginate); Translation, post-translational modification and degradation; Protein secretion / Export apparatus |
| PA14_59340 | pilT2 | 2.01   | 0.000 | type IV B pilus protein                                                                     | Motility / Attachment                                                                                                                            |
| PA14_45020 | glgR* | 6.32   | 0.000 | putative oxidoreductase                                                                     | Putative enzymes                                                                                                                                 |
| PA14_68360 | 0     | 2.58   | 0.000 | putative beta-ketoacyl synthase                                                             | Fatty acid and phospholipid metabolism                                                                                                           |
| PA14_33600 | 0     | 5.19   | 0.000 | putative iron-regulated membrane protein                                                    | Membrane proteins                                                                                                                                |
| PA14_15460 | merA  | 3.01   | 0.000 | Mercuric reductase MerA                                                                     | Adaptation / Protection                                                                                                                          |
| PA14_61200 | 0     | 2.82   | 0.000 | conserved hypothetical protein                                                              | Secreted factors (toxins, enzymes, alginate); Cell wall / LPS / capsule                                                                          |
| PA14_20080 | 0     | 3.48   | 0.000 | putative membrane protein                                                                   | Antibiotic resistance and susceptibility                                                                                                         |
| PA14_31760 | cdsA* | 3.53   | 0.000 | putative phosphatidate cytidylyltransferase                                                 | Fatty acid and phospholipid metabolism                                                                                                           |
| PA14_06500 | bioB  | 2.48   | 0.000 | biotin synthase                                                                             | Biosynthesis of cofactors, prosthetic groups and carriers                                                                                        |
| PA14_51730 | tolA  | 2.49   | 0.000 | TolA protein                                                                                | Membrane proteins; Transport of small molecules                                                                                                  |
| PA14_12130 | lis   | 2.40   | 0.000 | Lipoate synthase                                                                            | Biosynthesis of cofactors, prosthetic groups and carriers                                                                                        |
| PA14_17280 | mesJ* | 2.90   | 0.000 | putative cell cycle protein                                                                 | Cell division                                                                                                                                    |
| PA14_54890 | 0     | 2.92   | 0.000 | hypothetical protein                                                                        | Hypothetical, unclassified or unknown                                                                                                            |
| PA14_04680 | 0     | 3.01   | 0.000 | putative phosphate acyltransferase                                                          | Fatty acid and phospholipid metabolism                                                                                                           |
| PA14_41590 | cmgX* | 2.39   | 0.000 | putative cytoplasmic membrane protein                                                       | Membrane proteins                                                                                                                                |
| PA14_04180 | 0     | 4.59   | 0.000 | conserved hypothetical protein                                                              | Hypothetical, unclassified or unknown                                                                                                            |
| PA14_51770 | ybgC* | 2.55   | 0.000 | conserved hypothetical protein                                                              | Hypothetical, unclassified or unknown                                                                                                            |
| PA14_31750 | 0     | 4.02   | 0.000 | putative acyltransferase                                                                    | Fatty acid and phospholipid metabolism                                                                                                           |
| PA14_33560 | 0     | 5.47   | 0.000 | putative adhesion protein                                                                   | Motility / Attachment                                                                                                                            |
| PA14_42380 | exsD* | 2.51   | 0.000 | conserved hypothetical protein                                                              | Hypothetical, unclassified or unknown                                                                                                            |
| PA14_23500 | tyrB  | 2.28   | 0.000 | putative amino acid aminotransferase                                                        | Amino acid biosynthesis and metabolism; Putative enzymes                                                                                         |
| PA14_43680 | fabA  | 2.86   | 0.000 | beta-hydroxyacyl-ACP dehydrase                                                              | Fatty acid and phospholipid metabolism                                                                                                           |
| PA14_06510 | bioF  | 2.69   | 0.000 | 8-amino-7-oxononanoate synthase                                                             | Biosynthesis of cofactors, prosthetic groups and carriers                                                                                        |
| PA14_31350 | 0     | 3.80   | 0.000 | conserved hypothetical protein                                                              | Hypothetical, unclassified or unknown                                                                                                            |
| PA14_51750 | tolQ  | 2.34   | 0.000 | TolQ protein                                                                                | Membrane proteins; Transport of small molecules                                                                                                  |
| PA14_03265 | 0     | 2.70   | 0.000 | hypothetical protein                                                                        | Hypothetical, unclassified or unknown                                                                                                            |
| PA14_29740 | 0     | 2.93   | 0.000 | putative two-component sensor                                                               | Two-component regulatory systems                                                                                                                 |
| PA14_43670 | 0     | 2.50   | 0.000 | putative sensor/response regulator hybrid                                                   | Transcriptional regulators; Two-component regulatory systems; Cell wall / LPS / capsule; Motility / Attachment; Chemotaxis                       |
| PA14_06530 | bioH* | 2.56   | 0.000 | putative biotin biosynthesis protein bioH                                                   | Biosynthesis of cofactors, prosthetic groups and carriers                                                                                        |
| PA14_33590 | 0     | 6.37   | 0.000 | conserved hypothetical protein                                                              | Membrane proteins                                                                                                                                |
| PA14_29720 | 0     | 2.84   | 0.000 | putative lipoprotein                                                                        | Fatty acid and phospholipid metabolism                                                                                                           |
| PA14_56040 | 0     | 3.53   | 0.000 | putative deacetylase                                                                        | Putative enzymes                                                                                                                                 |
| PA14_31730 | 0     | 3.54   | 0.000 | putative dual specificity phosphatase                                                       | Putative enzymes; Membrane proteins                                                                                                              |
| PA14_42340 | pscD  | 3.25   | 0.000 | type III export protein PscD                                                                | Protein secretion / Export apparatus                                                                                                             |
| PA14_08560 | tyrZ  | 2.17   | 0.000 | tyrosyl-tRNA synthetase 2                                                                   | Amino acid biosynthesis and metabolism; Translation, post-translational modification and degradation                                             |
| PA14_64100 | accB  | 2.56   | 0.000 | biotin carboxyl carrier protein                                                             | Fatty acid and phospholipid metabolism                                                                                                           |
| PA14_33530 | 0     | 4.30   | 0.000 | putative ABC transporter, periplasmic substrate-binding protein                             | Motility / Attachment                                                                                                                            |
| PA14_64590 | 0     | 2.90   | 0.000 | putative MFS transporter                                                                    | Membrane proteins; Transport of small molecules                                                                                                  |
| PA14_43710 | 0     | 2.71   | 0.000 | putative methyl-accepting chemotaxis transducer                                             | Adaptation / Protection; Chemotaxis                                                                                                              |
| PA14_06540 | bioC* | 3.06   | 0.000 | putative biotin synthesis protein BioC                                                      | Biosynthesis of cofactors, prosthetic groups and carriers                                                                                        |
| PA14_57890 | 0     | 2.21   | 0.000 | putative toluene tolerance ABC efflux transporter                                           | Membrane proteins; Transport of small molecules                                                                                                  |
| PA14_51310 | ykfI* | 2.86   | 0.000 | conserved hypothetical protein                                                              | Hypothetical, unclassified or unknown                                                                                                            |
| PA14_12550 | 0     | 3.00   | 0.000 | hypothetical protein                                                                        | Hypothetical, unclassified or unknown                                                                                                            |
| PA14_41610 | crfX* | 2.15   | 0.000 | conserved hypothetical protein                                                              | Hypothetical, unclassified or unknown                                                                                                            |
| PA14_05530 | mexA  | 2.02   | 0.000 | RND multidrug efflux membrane fusion protein MexA precursor                                 | Transport of small molecules; Antibiotic resistance and susceptibility                                                                           |
| PA14_48680 | 0     | 4.04   | 0.000 | putative flavoprotein involved in K+ transport                                              | Transport of small molecules                                                                                                                     |
| PA14_59710 | cupD1 | 3.25   | 0.000 | putative fibrillar protein precursor                                                        | Motility / Attachment                                                                                                                            |
| PA14_42270 | pscJ  | 2.60   | 0.000 | pscJ type III export protein                                                                | Secreted factors (toxins, enzymes, alginate); Protein secretion / Export apparatus                                                               |
| PA14_62650 | 0     | 2.11   | 0.000 | conserved hypothetical protein                                                              | Hypothetical, unclassified or unknown                                                                                                            |
| PA14_29730 | 0     | 2.92   | 0.000 | putative two-component response regulator                                                   | Transcriptional regulators; Two-component regulatory systems                                                                                     |
| PA14_42300 | pscG  | 4.07   | 0.000 | type III export protein PscG                                                                | Protein secretion / Export apparatus; Chaperones / Heat shock proteins                                                                           |
| PA14_18850 | 0     | 7.00   | 0.000 | putative lyase                                                                              | Carbon compound catabolism; Putative enzymes                                                                                                     |
| PA14_48890 | 0     | 3.22   | 0.000 | conserved hypothetical protein                                                              | Related to phage, transposon or plasmid                                                                                                          |
| PA14_41575 | sigK  | 4.25   | 0.000 | ECF-sigma factor SigX                                                                       | Transcriptional regulators                                                                                                                       |
| PA14_15435 | 0     | 3.05   | 0.000 | hypothetical protein                                                                        | Hypothetical, unclassified or unknown                                                                                                            |
| PA14_36110 | 0     | 999.00 | 0.000 | putative hydrolase                                                                          | Putative enzymes                                                                                                                                 |
| PA14_45010 | hyl*  | 4.84   | 0.000 | putative hydroxypyruvate isomerase                                                          | Central intermediary metabolism                                                                                                                  |
| PA14_00480 | 0     | 3.91   | 0.000 | conserved hypothetical protein                                                              | Hypothetical, unclassified or unknown                                                                                                            |
| PA14_33650 | pvdD  | 2.20   | 0.000 | pyoverdine synthetase D                                                                     | Secreted factors (toxins, enzymes, alginate); Adaptation / Protection                                                                            |
| PA14_59070 | 0     | 2.55   | 0.000 | conserved Hypothetical Protein                                                              | Hypothetical, unclassified or unknown                                                                                                            |
| PA14_37660 | 0     | 3.00   | 0.000 | conserved hypothetical protein                                                              | Transcriptional regulators                                                                                                                       |
| PA14_42360 | pscB  | 4.47   | 0.000 | type III export apparatus protein                                                           | Protein secretion / Export apparatus                                                                                                             |
| PA14_05550 | oprM  | 1.76   | 0.000 | major intrinsic multiple antibiotic resistance efflux outer membrane protein OprM precursor | Antibiotic resistance and susceptibility; Membrane proteins; Transport of small molecules                                                        |
| PA14_05540 | mexB  | 1.71   | 0.000 | RND multidrug efflux transporter MexB                                                       | Transport of small molecules; Membrane proteins; Antibiotic resistance and susceptibility                                                        |
| PA14_11100 | cupB5 | 3.88   | 0.000 | adhesive protein CupB5                                                                      | Motility / Attachment                                                                                                                            |
| PA14_03285 | 0     | 2.08   | 0.000 | conserved hypothetical protein                                                              | Hypothetical, unclassified or unknown                                                                                                            |
| PA14_42390 | pscH  | 2.51   | 0.000 | Protein III export protein PscH                                                             | Protein secretion / Export apparatus                                                                                                             |
| PA14_66350 | 0     | 2.73   | 0.000 | putative acyl-CoA dehydrogenase                                                             | Fatty acid and phospholipid metabolism; Putative enzymes                                                                                         |
| PA14_36520 | 0     | 6.11   | 0.000 | conserved hypothetical protein                                                              | Hypothetical, unclassified or unknown                                                                                                            |
| PA14_42280 | pscI  | 2.20   | 0.000 | type III export protein PscI                                                                | Protein secretion / Export apparatus                                                                                                             |



|            |        |        |       |                                                                       |                                                                                                       |
|------------|--------|--------|-------|-----------------------------------------------------------------------|-------------------------------------------------------------------------------------------------------|
| PA14_43660 | 0      | 2.59   | 0.000 | putative ABC transporter substrate-binding protein                    | Transport of small molecules                                                                          |
| PA14_45100 | muuA*  | 3.52   | 0.000 | putative mucoidy inhibitor A                                          | Transport of small molecules                                                                          |
| PA14_42410 | 0      | 2.89   | 0.000 | hypothetical protein                                                  | Transcriptional regulators; Protein secretion / Export apparatus                                      |
| PA14_54880 | 0      | 2.63   | 0.000 | putative serine acetyltransferase                                     | Putative enzymes                                                                                      |
| PA14_33550 | 0      | 5.66   | 0.000 | putative ATP-binding component of ABC transporter                     | Transport of small molecules                                                                          |
| PA14_33280 | pvtL   | 3.38   | 0.000 | PvtL                                                                  | Adaptation / Protection                                                                               |
| PA14_04530 | 0      | 4.10   | 0.000 | hypothetical protein                                                  | Hypothetical, unclassified or unknown                                                                 |
| PA14_08570 | bioD   | 2.47   | 0.000 | dethiobiotin synthase                                                 | Biosynthesis of cofactors, prosthetic groups and carriers                                             |
| PA14_42390 | exsA   | 2.90   | 0.000 | transcriptional regulator ExsA                                        | Protein secretion / Export apparatus; Transcriptional regulators                                      |
| PA14_55000 | 0      | 4.23   | 0.000 | possible ABC-type transporter, periplasmic component                  | Transport of small molecules                                                                          |
| PA14_57870 | 0      | 1.73   | 0.000 | putative toluene tolerance ABC efflux transporter                     | Membrane proteins; Transport of small molecules                                                       |
| PA14_42250 | pscL   | 3.18   | 0.000 | type III export protein PscL                                          | Protein secretion / Export apparatus                                                                  |
| PA14_51720 | toIB   | 1.61   | 0.000 | ToIB protein                                                          | Transport of small molecules                                                                          |
| PA14_03270 | 0      | 2.15   | 0.000 | conserved hypothetical protein                                        | Hypothetical, unclassified or unknown                                                                 |
| PA14_51930 | helX*  | 2.05   | 0.000 | probable thiorodoxin                                                  | Putative enzymes                                                                                      |
| PA14_51740 | toIR   | 2.36   | 0.000 | ToIR protein                                                          | Transport of small molecules                                                                          |
| PA14_28520 | 0      | 4.51   | 0.000 | hypothetical protein                                                  | Hypothetical, unclassified or unknown                                                                 |
| PA14_14660 | yclJ*  | 1.80   | 0.000 | putative outer membrane protein                                       | Protein secretion / Export apparatus; Membrane proteins                                               |
| PA14_02470 | pntB   | 2.71   | 0.000 | pyridine nucleotide transhydrogenase, beta subunit                    | Transport of small molecules; Energy metabolism                                                       |
| PA14_17220 | lpxB   | 1.62   | 0.000 | lipid A-disaccharide synthase                                         | Cell wall / LPS / capsule                                                                             |
| PA14_05810 | amaB   | 3.98   | 0.000 | N-carbamoyl-beta-alanine amidohydrolase                               | Nucleotide biosynthesis and metabolism                                                                |
| PA14_57850 | 0      | 1.77   | 0.000 | conserved hypothetical protein                                        | Hypothetical, unclassified or unknown                                                                 |
| PA14_25100 | 0      | 2.64   | 0.000 | conserved hypothetical protein                                        | Hypothetical, unclassified or unknown                                                                 |
| PA14_18380 | algA   | 3.71   | 0.000 | mannose-1-phosphate guanylyltransferase/mannose-6-phosphate isomerase | Cell wall / LPS / capsule; Adaptation / Protection; Secreted factors (toxins, enzymes, alginate)      |
| PA14_59350 | pilV2  | 2.64   | 0.000 | Type IV B pilus protein                                               | Motility / Attachment                                                                                 |
| PA14_43380 | kqbB   | 6.26   | 0.000 | potassium-transporting ATPase, B chain                                | Transport of small molecules                                                                          |
| PA14_30970 | bprR*  | 2.00   | 0.000 | putative transcriptional regulator                                    | Transcriptional regulators                                                                            |
| PA14_42670 | 0      | 1.63   | 0.000 | putative membrane protein                                             | Membrane proteins                                                                                     |
| PA14_33540 | 0      | 3.81   | 0.000 | putative permease of ABC transporter                                  | Membrane proteins; Transport of small molecules                                                       |
| PA14_28620 | 0      | 999.00 | 0.000 | conserved hypothetical protein                                        | Membrane proteins                                                                                     |
| PA14_67780 | 0      | 4.08   | 0.000 | putative membrane protein                                             | Membrane proteins                                                                                     |
| PA14_33630 | pvdJ   | 1.83   | 0.000 | PvdJ                                                                  | Adaptation / Protection                                                                               |
| PA14_51780 | ruvB   | 1.53   | 0.000 | Holliday junction DNA helicase RuvB                                   | DNA replication, recombination, modification and repair                                               |
| PA14_20110 | 0      | 2.38   | 0.000 | putative ABC-type multidrug transport system, permease component      | Antibiotic resistance and susceptibility; Membrane proteins                                           |
| PA14_45050 | pykF   | 3.18   | 0.000 | pyruvate kinase I                                                     | Energy metabolism; Carbon compound catabolism                                                         |
| PA14_58610 | 0      | 2.02   | 0.000 | putative membrane-associated, metal-dependent hydrolase               | Putative enzymes                                                                                      |
| PA14_42260 | pscK   | 2.70   | 0.000 | PscK type III export protein                                          | Secreted factors (toxins, enzymes, alginate); Protein secretion / Export apparatus                    |
| PA14_27200 | 0      | 2.53   | 0.000 | conserved hypothetical protein                                        | Hypothetical, unclassified or unknown                                                                 |
| PA14_17230 | rnhB   | 1.79   | 0.000 | ribonuclease HII                                                      | DNA replication, recombination, modification and repair                                               |
| PA14_43970 | lpxG   | 1.33   | 0.000 | lipamide dehydrogenase-glc                                            | Amino acid biosynthesis and metabolism; Energy metabolism                                             |
| PA14_54920 | 0      | 2.09   | 0.000 | putative non-ribosomal peptide synthetase                             | Putative enzymes                                                                                      |
| PA14_44010 | sucA   | 1.41   | 0.000 | 2-oxoglutarate dehydrogenase (E1 subunit)                             | Amino acid biosynthesis and metabolism; Energy metabolism                                             |
| PA14_53910 | pmtA   | 2.99   | 0.000 | phospholipid methyltransferase                                        | Fatty acid and phospholipid metabolism                                                                |
| PA14_63230 | yedA*  | 2.08   | 0.000 | putative transmembrane protein                                        | Transport of small molecules; Membrane proteins                                                       |
| PA14_23900 | cypA   | 1.93   | 0.000 | putative colicin V production protein                                 | Membrane proteins; Adaptation / Protection                                                            |
| PA14_36500 | 0      | 3.29   | 0.000 | putative cellulase                                                    | Carbon compound catabolism                                                                            |
| PA14_31740 | 0      | 3.99   | 0.000 | hypothetical protein                                                  | Membrane proteins                                                                                     |
| PA14_57830 | 0      | 2.81   | 0.000 | conserved hypothetical protein                                        | Hypothetical, unclassified or unknown                                                                 |
| PA14_01200 | 0      | 2.58   | 0.000 | Hypothetical protein                                                  | Hypothetical, unclassified or unknown                                                                 |
| PA14_64120 | 0      | 2.04   | 0.000 | conserved hypothetical protein                                        | Membrane proteins                                                                                     |
| PA14_59940 | 0      | 2.08   | 0.000 | conserved hypothetical protein                                        | Hypothetical, unclassified or unknown                                                                 |
| PA14_55400 | 0      | 1.85   | 0.000 | hypothetical protein                                                  | Hypothetical, unclassified or unknown                                                                 |
| PA14_64530 | 0      | 4.56   | 0.000 | hypothetical protein                                                  | Hypothetical, unclassified or unknown                                                                 |
| PA14_58900 | 0      | 2.56   | 0.000 | Large exoprotein                                                      | Protein secretion / Export apparatus; Membrane proteins; Secreted factors (toxins, enzymes, alginate) |
| PA14_39780 | hvn*   | 4.26   | 0.001 | putative halovibrin                                                   | Transport of small molecules; Putative enzymes                                                        |
| PA14_51960 | rhn*   | 1.70   | 0.001 | probable ribonuclease                                                 | Transcription, RNA processing and degradation                                                         |
| PA14_54420 | mucA   | 1.32   | 0.001 | anti-sigma factor MucA                                                | Secreted factors (toxins, enzymes, alginate); Transcriptional regulators; Cell wall / LPS / capsule   |
| PA14_33680 | fpvA   | 2.54   | 0.001 | ferritinoverdine receptor                                             | Transport of small molecules                                                                          |
| PA14_29710 | 0      | 2.70   | 0.001 | conserved hypothetical protein                                        | Hypothetical, unclassified or unknown                                                                 |
| PA14_33610 | 0      | 2.00   | 0.001 | probable non-ribosomal peptide synthetase                             | Putative enzymes                                                                                      |
| PA14_30990 | 0      | 1.88   | 0.001 | hypothetical                                                          | Hypothetical, unclassified or unknown                                                                 |
| PA14_57840 | ttg2D* | 1.75   | 0.001 | putative toluene tolerance protein                                    | Adaptation / Protection                                                                               |
| PA14_33570 | 0      | 5.88   | 0.001 | conserved hypothetical protein                                        | Hypothetical, unclassified or unknown                                                                 |
| PA14_41560 | nasa*  | 4.58   | 0.001 | assimilatory nitrate reductase                                        | Central intermediary metabolism                                                                       |
| PA14_56620 | 0      | 2.86   | 0.001 | putative transcriptional regulator                                    | Transcriptional regulators                                                                            |
| PA14_25690 | fabF1  | 1.17   | 0.001 | beta-ketoacyl-acyl carrier protein synthase II                        | Fatty acid and phospholipid metabolism                                                                |
| PA14_51050 | pcd*   | 2.95   | 0.001 | probable aldehyde dehydrogenase                                       | Putative enzymes                                                                                      |
| PA14_29300 | 0      | 2.89   | 0.001 | putative transcriptional regulator                                    | Transcriptional regulators                                                                            |
| PA14_31360 | 0      | 3.08   | 0.001 | hypothetical protein                                                  | Hypothetical, unclassified or unknown                                                                 |
| PA14_62660 | 0      | 1.56   | 0.001 | conserved hypothetical protein                                        | Hypothetical, unclassified or unknown                                                                 |
| PA14_41300 | 0      | 3.25   | 0.002 | hypothetical protein                                                  | Hypothetical, unclassified or unknown                                                                 |
| PA14_42320 | pscE   | 2.28   | 0.002 | type III export protein PscE                                          | Protein secretion / Export apparatus; Chaperones / Heat shock proteins                                |
| PA14_17210 | lpxA   | 1.79   | 0.002 | UDP-N-acetylglucosamine acetyltransferase                             | Cell wall / LPS / capsule                                                                             |
| PA14_19370 | asnB*  | 1.91   | 0.002 | putative asparagine synthetase, glutamine-hydrolyzing                 | Amino acid biosynthesis and metabolism                                                                |
| PA14_52070 | 0      | 1.85   | 0.002 | probable transcriptional regulator                                    | Transcriptional regulators                                                                            |
| PA14_25730 | 0      | 1.66   | 0.002 | putative aminodeoxychorismate lyase                                   | Putative enzymes                                                                                      |
| PA14_03170 | 0      | 1.90   | 0.002 | conserved hypothetical protein                                        | Related to phage, transposon or plasmid                                                               |
| PA14_30980 | 0      | 2.02   | 0.003 | hypothetical                                                          | Hypothetical, unclassified or unknown                                                                 |
| PA14_00070 | 0      | 1.77   | 0.003 | putative histidinol-phosphatase                                       | Transport of small molecules                                                                          |
| PA14_37220 | 0      | 2.51   | 0.003 | putative LysR-family transcriptional regulator                        | Transcriptional regulators                                                                            |
| PA14_37690 | 0      | 2.67   | 0.003 | putative sensory box protein                                          | Two-component regulatory systems; Membrane proteins                                                   |
| PA14_50730 | phaA   | 1.53   | 0.003 | probable NADH dehydrogenase                                           | Membrane proteins; Putative enzymes                                                                   |
| PA14_20750 | 0      | 1.08   | 0.003 | putative chemotaxis signal transduction protein                       | Adaptation / Protection; Chemotaxis                                                                   |
| PA14_59320 | pilS2  | 2.75   | 0.003 | type IV B pilus protein                                               | Motility / Attachment                                                                                 |
| PA14_31370 | lam*   | 2.01   | 0.003 | putative trans-acetylase methyltransferase                            | Putative enzymes                                                                                      |
| PA14_44520 | ygdR*  | 3.79   | 0.003 | putative drug efflux transporter                                      | Membrane proteins; Transport of small molecules                                                       |
| PA14_61190 | 0      | 2.22   | 0.003 | putative hemolysin activation/secretion protein                       | Protein secretion / Export apparatus; Cell wall / LPS / capsule                                       |
| PA14_20760 | cheR*  | 1.18   | 0.003 | putative chemotaxis protein methyltransferase                         | Adaptation / Protection; Chemotaxis                                                                   |
| PA14_68840 | 0      | 2.78   | 0.003 | conserved hypothetical protein                                        | Hypothetical, unclassified or unknown                                                                 |
| PA14_71260 | 0      | 2.86   | 0.003 | putative oxidoreductase, FMN-binding                                  | Energy metabolism; Amino acid biosynthesis and metabolism                                             |
| PA14_01290 | coxB   | 2.00   | 0.003 | cytochrome c oxidase, subunit II                                      | Energy metabolism                                                                                     |
| PA14_04270 | 0      | 2.53   | 0.003 | putative transcriptional regulator                                    | Transcriptional regulators                                                                            |
| PA14_72060 | 0      | 1.79   | 0.003 | conserved hypothetical protein                                        | Hypothetical, unclassified or unknown                                                                 |
| PA14_03160 | 0      | 1.76   | 0.003 | hypothetical protein                                                  | Hypothetical, unclassified or unknown                                                                 |
| PA14_42680 | 0      | 1.24   | 0.003 | conserved hypothetical protein                                        | Hypothetical, unclassified or unknown                                                                 |

|            |       |        |       |                                                                         |                                                                                                     |
|------------|-------|--------|-------|-------------------------------------------------------------------------|-----------------------------------------------------------------------------------------------------|
| PA14_03310 | 0     | 1.71   | 0.003 | hypothetical protein                                                    | Hypothetical, unclassified or unknown                                                               |
| PA14_10230 | adh   | 3.19   | 0.004 | 2,3-butanediol dehydrogenase                                            | Carbon compound catabolism                                                                          |
| PA14_46620 | 0     | 1.52   | 0.004 | putative pyridine nucleotide-disulphide oxidoreductase                  | Putative enzymes                                                                                    |
| PA14_11110 | cupB6 | 2.62   | 0.004 | fimbrial protein cupB6                                                  | Motility / Attachment                                                                               |
| PA14_01220 | 0     | 1.97   | 0.004 | Hypothetical protein                                                    | Hypothetical, unclassified or unknown                                                               |
| PA14_18430 | algJ  | 999.00 | 0.004 | alginate O-acetyltransferase AlgJ                                       | Cell wall / LPS / capsule; Adaptation / Protection; Secreted factors (toxins, enzymes, alginate)    |
| PA14_30860 | trbG* | 5.02   | 0.004 | TrbG-like protein                                                       | Related to phage, transposon or plasmid                                                             |
| PA14_63220 | 0     | 2.73   | 0.004 | Hypothetical protein                                                    | Hypothetical, unclassified or unknown                                                               |
| PA14_72210 | 0     | 1.67   | 0.004 | conserved hypothetical protein                                          | Antibiotic resistance and susceptibility                                                            |
| PA14_52300 | 0     | 2.31   | 0.004 | hypothetical protein                                                    | Hypothetical, unclassified or unknown; Membrane proteins                                            |
| PA14_68440 | 0     | 2.30   | 0.004 | putative oxidoreductase, molybdopterin-binding                          | Energy metabolism; Putative enzymes                                                                 |
| PA14_32740 | optS* | 4.36   | 0.004 | probable TonB-dependent receptor                                        | Transport of small molecules                                                                        |
| PA14_20000 | 0     | 4.35   | 0.004 | putative Fe2+-dicitrate sensor, membrane component                      | Membrane proteins; Transcriptional regulators                                                       |
| PA14_63330 | 0     | 3.41   | 0.005 | putative glycerophosphodiesterase                                       | Fatty acid and phospholipid metabolism                                                              |
| PA14_64090 | aroQ1 | 2.21   | 0.005 | 3-dehydroquinate dehydratase                                            | Amino acid biosynthesis and metabolism                                                              |
| PA14_24370 | 0     | 2.02   | 0.005 | hypothetical protein                                                    | Hypothetical, unclassified or unknown                                                               |
| PA14_12450 | 0     | 1.79   | 0.005 | possible acyl-CoA dehydrogenase                                         | Fatty acid and phospholipid metabolism; Putative enzymes                                            |
| PA14_51690 | 0     | 1.16   | 0.005 | conserved hypothetical protein                                          | Hypothetical, unclassified or unknown                                                               |
| PA14_36100 | ptxA  | 5.20   | 0.005 | putative pyridoxal phosphate biosynthesis protein                       | Biosynthesis of cofactors, prosthetic groups and carriers                                           |
| PA14_62330 | phuS  | 2.86   | 0.006 | putative haem degrading factor                                          | Putative enzymes                                                                                    |
| PA14_59060 | 0     | 3.38   | 0.006 | hypothetical protein                                                    | Hypothetical, unclassified or unknown                                                               |
| PA14_18410 | algF  | 4.73   | 0.006 | alginate O-acetyltransferase                                            | Cell wall / LPS / capsule; Adaptation / Protection; Secreted factors (toxins, enzymes, alginate)    |
| PA14_19360 | 0     | 2.43   | 0.006 | putative acetyltransferase, GNAT family                                 | Putative enzymes                                                                                    |
| PA14_14100 | yhdW* | 2.12   | 0.006 | Putative amino-acid ABC transporter binding protei                      | Transport of small molecules                                                                        |
| PA14_20100 | 0     | 1.83   | 0.006 | putative ABC-type multidrug transport system, permease component        | Antibiotic resistance and susceptibility; Membrane proteins                                         |
| PA14_49130 | dcaA  | 3.25   | 0.006 | O4-dicarbonylate transport protein                                      | Transport of small molecules                                                                        |
| PA14_44000 | suaB  | 1.52   | 0.007 | dihydroisamide succinyltransferase (E2 subunit)                         | Energy metabolism                                                                                   |
| PA14_50700 | phaE  | 1.95   | 0.007 | conserved hypothetical protein                                          | Membrane proteins                                                                                   |
| PA14_55920 | 0     | 2.21   | 0.007 | putative type II secretion system protein                               | Protein secretion / Export apparatus; Motility / Attachment                                         |
| PA14_25710 | pabC  | 1.17   | 0.008 | 4-amino-4-deoxychorismate lyase                                         | Biosynthesis of cofactors, prosthetic groups and carriers                                           |
| PA14_42200 | 0     | 2.07   | 0.008 | conserved hypothetical protein                                          | Hypothetical, unclassified or unknown                                                               |
| PA14_26090 | cif   | 2.43   | 0.008 | putative hydrolase                                                      | Putative enzymes                                                                                    |
| PA14_54910 | 0     | 2.88   | 0.008 | putative thioesterase                                                   | Putative enzymes                                                                                    |
| PA14_32390 | mexF  | 1.85   | 0.009 | RND multidrug efflux transporter MexF                                   | Transport of small molecules; Membrane proteins; Antibiotic resistance and susceptibility           |
| PA14_18830 | 0     | 3.21   | 0.009 | putative lyase                                                          | Carbon compound catabolism                                                                          |
| PA14_67450 | bic   | 1.41   | 0.009 | outer membrane lipoprotein Bic                                          | Cell wall / LPS / capsule; Membrane proteins                                                        |
| PA14_13850 | moaA  | 5.43   | 0.009 | molybdenum cofactor biosynthesis protein A                              | Biosynthesis of cofactors, prosthetic groups and carriers                                           |
| PA14_15430 | tnpR* | 2.19   | 0.009 | putative resolvase, essential for transposition                         | Related to phage, transposon or plasmid; DNA replication, recombination, modification and repair    |
| PA14_42400 | oxeB  | 3.34   | 0.009 | exoenzyme S synthesis protein B                                         | Translation, post-translational modification and degradation; Protein secretion / Export apparatus  |
| PA14_54860 | 0     | 3.41   | 0.009 | hypothetical protein                                                    | Hypothetical, unclassified or unknown                                                               |
| PA14_36480 | 0     | 3.58   | 0.009 | hypothetical protein                                                    | Hypothetical, unclassified or unknown                                                               |
| PA14_15445 | merE  | 3.22   | 0.009 | Hypothetical mercuric resistance protein merE                           | Hypothetical, unclassified or unknown                                                               |
| PA14_72870 | 0     | 1.70   | 0.009 | putative glutamate-1-semialdehyde aminotransferase                      | Biosynthesis of cofactors, prosthetic groups and carriers; Putative enzymes                         |
| PA14_03070 | potR* | 1.84   | 0.009 | putative transcriptional regulator                                      | Transcriptional regulators                                                                          |
| PA14_28170 | yfjC* | 3.39   | 0.009 | putative transporter, formate/nitrite transporter family                | Transport of small molecules; Membrane proteins                                                     |
| PA14_26760 | 0     | 1.59   | 0.009 | putative transcriptional regulator                                      | Transcriptional regulators                                                                          |
| PA14_59090 | 0     | 1.66   | 0.010 | conserved hypothetical protein                                          | Hypothetical, unclassified or unknown                                                               |
| PA14_15450 | merD  | 3.53   | 0.010 | Mercuric resistance transcriptional repressor protein MerD              | Transcriptional regulators                                                                          |
| PA14_05440 | 0     | 1.57   | 0.011 | hypothetical protein                                                    | Hypothetical, unclassified or unknown                                                               |
| PA14_45030 | ttuD* | 3.38   | 0.011 | putative hydroxypyruvate reductase                                      | Carbon compound catabolism; Putative enzymes                                                        |
| PA14_58990 | 0     | 2.16   | 0.011 | Putative DNA helicase                                                   | Putative enzymes                                                                                    |
| PA14_04690 | 0     | 1.06   | 0.011 | conserved hypothetical protein                                          | Hypothetical, unclassified or unknown                                                               |
| PA14_15770 | 0     | 1.50   | 0.011 | conserved hypothetical protein                                          | Hypothetical, unclassified or unknown                                                               |
| PA14_42310 | pscF  | 2.74   | 0.011 | type III export protein PscF                                            | Protein secretion / Export apparatus                                                                |
| PA14_56030 | 0     | 2.96   | 0.011 | putative glycosyl transferase                                           | Transport of small molecules                                                                        |
| PA14_51040 | 0     | 2.70   | 0.012 | probable oxidoreductase                                                 | Putative enzymes                                                                                    |
| PA14_55390 | 0     | 999.00 | 0.012 | hypothetical protein                                                    | Hypothetical, unclassified or unknown                                                               |
| PA14_54970 | 0     | 2.66   | 0.012 | possible ABC transporter protein                                        | Transport of small molecules                                                                        |
| PA14_21570 | 0     | 2.94   | 0.013 | conserved hypothetical protein                                          | Hypothetical, unclassified or unknown                                                               |
| PA14_24860 | snr1  | 2.72   | 0.013 | cytochrome c Snr1                                                       | Energy metabolism                                                                                   |
| PA14_62350 | phuR  | 3.32   | 0.013 | putative haem/haemoglobin uptake outer membrane receptor PhuR precursor | Transport of small molecules                                                                        |
| PA14_72110 | 0     | 1.48   | 0.013 | conserved hypothetical protein                                          | Hypothetical, unclassified or unknown                                                               |
| PA14_59000 | 0     | 3.64   | 0.014 | Conserved hypothetical protein                                          | Hypothetical, unclassified or unknown                                                               |
| PA14_33830 | 0     | 4.53   | 0.014 | conserved hypothetical protein                                          | Hypothetical, unclassified or unknown                                                               |
| PA14_25670 | acpP  | 2.27   | 0.014 | acyl carrier protein                                                    | Fatty acid and phospholipid metabolism                                                              |
| PA14_47130 | 0     | 2.53   | 0.015 | conserved hypothetical protein                                          | Hypothetical, unclassified or unknown                                                               |
| PA14_24020 | xspT  | 1.34   | 0.015 | general secretion pathway protein G                                     | Protein secretion / Export apparatus                                                                |
| PA14_62420 | 0     | 1.32   | 0.015 | putative zinc metallopeptidase                                          | Putative enzymes                                                                                    |
| PA14_42480 | pcrG  | 2.35   | 0.015 | regulator in type III secretion                                         | Protein secretion / Export apparatus                                                                |
| PA14_50710 | phaD  | 1.37   | 0.015 | probable NADH dehydrogenase                                             | Membrane proteins; Putative enzymes                                                                 |
| PA14_54410 | mucB  | 1.06   | 0.015 | negative regulator for alginate biosynthesis MucB                       | Secreted factors (toxins, enzymes, alginate); Transcriptional regulators; Cell wall / LPS / capsule |
| PA14_43350 | kdpD  | 1.83   | 0.016 | two-component sensor KdpD                                               | Two-component regulatory systems                                                                    |
| PA14_54900 | spa2* | 1.67   | 0.016 | hypothetical protein                                                    | Hypothetical, unclassified or unknown                                                               |
| PA14_36120 | 0     | 4.48   | 0.017 | putative MFS transporter                                                | Membrane proteins; Transport of small molecules                                                     |
| PA14_55820 | 0     | 2.34   | 0.017 | putative membrane protein                                               | Membrane proteins; Motility / Attachment                                                            |
| PA14_34680 | 0     | 2.28   | 0.017 | putative amino acid oxidase                                             | Amino acid biosynthesis and metabolism; Putative enzymes                                            |
| PA14_31420 | 0     | 1.82   | 0.017 | hypothetical protein                                                    | Hypothetical, unclassified or unknown                                                               |
| PA14_25760 | hoB   | 1.05   | 0.017 | DNA polymerase III, delta prime subunit                                 | DNA replication, recombination, modification and repair                                             |
| PA14_41070 | 0     | 1.72   | 0.018 | conserved hypothetical protein                                          | Hypothetical, unclassified or unknown                                                               |
| PA14_47640 | 0     | 1.92   | 0.018 | putative major facilitator superfamily (MFS) transporter                | Membrane proteins; Transport of small molecules                                                     |
| PA14_61040 | katB  | 1.52   | 0.018 | catalase                                                                | Adaptation / Protection                                                                             |
| PA4704.1   | prfF1 | 2.76   | 0.019 |                                                                         | 0 Non-coding RNA gene (sRNA)                                                                        |
| PA14_32130 | benD  | 3.36   | 0.019 | cis-1,2-dihydroxycyclohexa-3,4-diene carboxylate dehydrogenase          | Carbon compound catabolism                                                                          |
| PA14_48950 | 0     | 2.26   | 0.019 | hypothetical protein of bacteriophage PF1                               | Related to phage, transposon or plasmid                                                             |
| PA14_11070 | cupB2 | 2.63   | 0.020 | chaperone CupB2                                                         | Motility / Attachment; Chaperones / Heat shock proteins                                             |
| PA14_22530 | spa2* | 1.54   | 0.021 | putative glutathione S-transferase                                      | Translation, post-translational modification and degradation                                        |
| PA14_45960 | lasR  | 1.14   | 0.021 | transcriptional regulator LasR                                          | Adaptation / Protection; Transcriptional regulators                                                 |
| PA14_24390 | 0     | 1.53   | 0.021 | putative TPR domain protein                                             | Putative enzymes                                                                                    |
| PA14_67460 | 0     | 1.46   | 0.021 | putative lipoprotein                                                    | Fatty acid and phospholipid metabolism                                                              |
| PA14_26810 | 0     | 999.00 | 0.022 | putative two-component sensor histidine kinase                          | Two-component regulatory systems                                                                    |
| PA14_33580 | 0     | 3.53   | 0.023 | conserved hypothetical protein                                          | Hypothetical, unclassified or unknown                                                               |
| PA14_10240 | acoC* | 3.99   | 0.023 | putative hydrolase                                                      | Carbon compound catabolism                                                                          |
| PA14_10200 | 0     | 3.99   | 0.023 | putative TonB-dependent receptor protein                                | Membrane proteins; Transport of small molecules                                                     |
| PA14_13030 | cioA  | 1.61   | 0.023 | CioA, cyanide insensitive terminal oxidase                              | Energy metabolism                                                                                   |
| PA14_16660 | cadA* | 1.31   | 0.023 | putative metal-transporting P-type ATPase                               | Membrane proteins; Transport of small molecules                                                     |

|            |         |        |       |                                                                 |                                                                                                                |
|------------|---------|--------|-------|-----------------------------------------------------------------|----------------------------------------------------------------------------------------------------------------|
| PA14_30850 | trbl*   | 5.16   | 0.023 | Trbl-like protein                                               | Related to phage, transposon or plasmid                                                                        |
| PA14_10120 | 0       | 2.15   | 0.024 | possible LysR family transcription regulator                    | Transcriptional regulators                                                                                     |
| PA14_61610 | 0       | 1.73   | 0.026 | conserved hypothetical protein                                  | Hypothetical, unclassified or unknown                                                                          |
| PA14_73140 | 0       | 1.63   | 0.026 | putative cyclopropan-fatty-acyl-phospholipid synthase           | Fatty acid and phospholipid metabolism; Putative enzymes                                                       |
| PA14_56480 | 0       | 2.60   | 0.026 | Metal-dependent amidase/aminoacylase/carboxypeptid              | Translation, post-translational modification and degradation; Putative enzymes                                 |
| PA14_51080 | 0       | 999.00 | 0.027 | Putative dioxygenase                                            | Putative enzymes                                                                                               |
| PA14_18960 | 0       | 2.35   | 0.027 | conserved hypothetical protein                                  | Hypothetical, unclassified or unknown                                                                          |
| PA14_48990 | 0       | 999.00 | 0.027 | hypothetical protein of bacteriophage P11                       | Related to phage, transposon or plasmid                                                                        |
| PA14_70950 | betB    | 1.38   | 0.027 | betaine aldehyde dehydrogenase                                  | Amino acid biosynthesis and metabolism; Adaptation / Protection                                                |
| PA14_22080 | 0       | 1.11   | 0.027 | possible resolvase                                              | Hypothetical, unclassified or unknown                                                                          |
| PA14_69470 | algR    | 1.06   | 0.028 | alginate biosynthesis regulatory protein AlgR                   | Secreted factors (toxins, enzymes, alginate); Transcriptional regulators; Two-component regulatory systems     |
| PA14_46510 | 0       | 1.39   | 0.028 | hypothetical protein                                            | Hypothetical, unclassified or unknown                                                                          |
| PA14_24010 | xcpS    | 1.53   | 0.029 | general secretion pathway protein F                             | Protein secretion / Export apparatus                                                                           |
| PA14_33500 | pvhH    | 5.11   | 0.029 | L-2,4-diaminobutyrate:2-ketoglutarate 4-aminotransferase, PvhH  | Adaptation / Protection                                                                                        |
| PA14_42460 | pchH    | 1.54   | 0.029 | regulatory protein PchH                                         | Secreted factors (toxins, enzymes, alginate); Protein secretion / Export apparatus                             |
| PA14_43400 | kdpA    | 2.59   | 0.029 | potassium-transporting ATPase, A chain                          | Transport of small molecules                                                                                   |
| PA14_02460 | pntAB*  | 3.07   | 0.029 | putative NAD(P) transhydrogenase, subunit alpha part 2          | Energy metabolism                                                                                              |
| PA14_22520 | 0       | 3.17   | 0.029 | hypothetical protein                                            | Hypothetical, unclassified or unknown                                                                          |
| PA14_68900 | fbpA*   | 2.01   | 0.031 | putative iron ABC transporter, periplasmic iron-binding protein | Transport of small molecules                                                                                   |
| PA14_04560 | 0       | 2.42   | 0.031 | conserved hypothetical protein                                  | Hypothetical, unclassified or unknown                                                                          |
| PA14_69170 | 0       | 1.55   | 0.031 | putative acyltransferase                                        | Putative enzymes; Membrane proteins; Cell wall / LPS / capsule                                                 |
| PA14_72370 | 0       | 2.63   | 0.031 | conserved hypothetical protein                                  | Membrane proteins                                                                                              |
| PA14_29570 | 0       | 2.48   | 0.032 | hypothetical protein                                            | Hypothetical, unclassified or unknown                                                                          |
| PA14_42440 | popD    | 1.15   | 0.032 | translocator outer membrane protein PopD precursor              | Protein secretion / Export apparatus                                                                           |
| PA14_32490 | 0       | 2.34   | 0.033 | hypothetical protein                                            | Hypothetical, unclassified or unknown                                                                          |
| PA14_09270 | pchE    | 3.89   | 0.033 | pyochelin synthetase                                            | Secreted factors (toxins, enzymes, alginate); Transport of small molecules                                     |
| PA14_40620 | 0       | 3.74   | 0.033 | putative MFS transporter                                        | Membrane proteins; Transport of small molecules                                                                |
| PA14_39020 | 0       | 999.00 | 0.033 | putative membrane protein                                       | Membrane proteins                                                                                              |
| PA14_45910 | 0       | 5.05   | 0.035 | putative RND efflux membrane fusion protein precursor           | Protein secretion / Export apparatus; Transport of small molecules                                             |
| PA14_09400 | phzS    | 1.58   | 0.035 | flavin-containing monooxygenase                                 | Putative enzymes                                                                                               |
| PA14_58950 | 0       | 4.28   | 0.035 | conserved hypothetical protein                                  | Hypothetical, unclassified or unknown                                                                          |
| PA14_13840 | 0       | 4.26   | 0.036 | putative peptidyl-prolyl cis-trans isomerase                    | Translation, post-translational modification and degradation; Chaperones / Heat shock proteins                 |
| PA14_17780 | 0       | 3.07   | 0.036 | putative major facilitator family transporter                   | Membrane proteins; Transport of small molecules                                                                |
| PA14_60020 | 0       | 1.64   | 0.036 | conserved hypothetical protein                                  | Hypothetical, unclassified or unknown                                                                          |
| PA14_63210 | 0       | 1.92   | 0.037 | putative two-component response regulator                       | Two-component regulatory systems; Transcriptional regulators; Motility / Attachment; Cell wall / LPS / capsule |
| PA14_34320 | 0       | 3.16   | 0.039 | putative monooxygenase, DszC family                             | Putative enzymes                                                                                               |
| PA14_08150 | gpD*    | 1.34   | 0.040 | putative phage late control gene D protein                      | Related to phage, transposon or plasmid                                                                        |
| PA14_71310 | etfB-1* | 999.00 | 0.040 | putative electron transfer flavoprotein, beta subunit           | Energy metabolism                                                                                              |
| PA14_64080 | digZ    | 1.09   | 0.040 | thiol:disulfide interchange protein                             | Translation, post-translational modification and degradation; Chaperones / Heat shock proteins                 |
| PA14_67300 | proX*   | 2.13   | 0.040 | putative binding protein component of ABC transporter           | Transport of small molecules                                                                                   |
| PA14_11190 | styD*   | 2.35   | 0.040 | putative aldehyde dehydrogenase                                 | Putative enzymes                                                                                               |
| PA14_36070 | 0       | 4.25   | 0.041 | putative enzyme                                                 | Putative enzymes                                                                                               |
| PA14_08300 | JF1*    | 1.18   | 0.041 | putative phage-related protein, tail component                  | Related to phage, transposon or plasmid                                                                        |
| PA14_21600 | 0       | 2.90   | 0.041 | putative membrane protein                                       | Membrane proteins                                                                                              |
| PA14_40260 | 0       | 1.53   | 0.041 | conserved hypothetical protein                                  | Antibiotic resistance and susceptibility                                                                       |
| PA14_59470 | 0       | 1.75   | 0.041 | hypothetical protein                                            | Hypothetical, unclassified or unknown                                                                          |
| PA14_49000 | 0       | 4.24   | 0.041 | hypothetical protein of bacteriophage P11                       | Related to phage, transposon or plasmid                                                                        |
| PA14_48930 | 0       | 4.38   | 0.041 | conserved hypothetical protein                                  | Related to phage, transposon or plasmid                                                                        |
| PA14_39420 | 0       | 4.99   | 0.042 | hypothetical protein                                            | Hypothetical, unclassified or unknown                                                                          |
| PA14_38860 | exaA    | 999.00 | 0.042 | PQQ-linked alcohol dehydrogenase                                | Carbon compound catabolism                                                                                     |
| PA14_64740 | pchA*   | 2.52   | 0.042 | putative aldehyde dehydrogenase                                 | Putative enzymes                                                                                               |
| PA14_31000 | 0       | 1.42   | 0.043 | hypothetical                                                    | Related to phage, transposon or plasmid                                                                        |
| PA14_48880 | intT*   | 1.31   | 0.043 | putative bacteriophage integrase                                | Putative enzymes; Related to phage, transposon or plasmid                                                      |
| PA14_47040 | yegH*   | 1.40   | 0.043 | putative membrane protein, TarC family                          | Membrane proteins                                                                                              |
| PA14_60100 | did     | 1.10   | 0.043 | deoxycytidine triphosphate deaminase                            | Translation, post-translational modification and degradation                                                   |
| PA14_58330 | 0       | 1.39   | 0.044 | conserved hypothetical protein                                  | Hypothetical, unclassified or unknown                                                                          |
| PA14_59735 | cupD3   | 1.99   | 0.044 | putative fimbrial biogenesis usher protein                      | Motility / Attachment                                                                                          |
| PA14_58970 | 0       | 2.34   | 0.047 | putative phage protein                                          | Related to phage, transposon or plasmid                                                                        |
| PA14_55540 | 0       | 2.46   | 0.047 | probable transmembrane sensor                                   | Membrane proteins; Transcriptional regulators                                                                  |
| PA14_26700 | 0       | 2.27   | 0.047 | putative acyl-CoA dehydrogenase                                 | Fatty acid and phospholipid metabolism; Putative enzymes                                                       |
| PA14_51550 | 0       | 1.37   | 0.048 | putative transposase                                            | Related to phage, transposon or plasmid                                                                        |
| PA14_31440 | 0       | 1.11   | 0.048 | hypothetical protein                                            | Hypothetical, unclassified or unknown                                                                          |
| PA14_72980 | 0       | 1.38   | 0.048 | Putative GTPases (G3E family)                                   | Putative enzymes                                                                                               |
| PA14_16370 | 0       | 2.68   | 0.048 | putative membrane protein                                       | Membrane proteins                                                                                              |
| PA14_33450 | treA    | 4.20   | 0.048 | periplasmic trehalase precursor                                 | Carbon compound catabolism                                                                                     |
| PA14_55300 | 0       | 2.99   | 0.048 | hypothetical protein                                            | Hypothetical, unclassified or unknown                                                                          |
| PA14_25740 | tmk     | 1.64   | 0.048 | thymidylate kinase                                              | Nucleotide biosynthesis and metabolism                                                                         |
| PA14_46820 | 0       | 2.72   | 0.049 | conserved hypothetical protein                                  | Hypothetical, unclassified or unknown                                                                          |
| PA14_63250 | yfcY*   | 2.25   | 0.049 | putative acyl-CoA thiolase                                      | Fatty acid and phospholipid metabolism; Putative enzymes                                                       |
| PA14_10560 | 0       | 1.15   | 0.049 | conserved hypothetical protein                                  | Hypothetical, unclassified or unknown                                                                          |
| PA14_46520 | 0       | 1.28   | 0.049 | hypothetical protein                                            | Hypothetical, unclassified or unknown                                                                          |

\* alternative gene name was provided when no gene name was annotated

\*\* p-value calculated equals False-Discovery-Rate (FDR)

\*\*\* PseudoCAP annotation was updated as previously described (see Material & Methods)

\*\*\*\* values of 999.000 or -999.000 occur when DESeq returned 'inf' or '-inf' as a fold change due to no reads in one of the two corresponding samples

**Table S3: The primary SigX regulon. Genes which were fulfilling at least two of the following criteria are considered to be members of the primary SigX regulon:**  
i) down-regulated in the  $\Delta sigX$  mutant compared to the wild-type and/or up-regulated in the *sigX* overexpressing strain compared to the empty vector wild-type control,  
ii) enriched promoter in both ChIP-seq experiments and iii) promoter harbors SigX binding motif.

| PA14 ID    | gene name* | Intersection               | Product name                                                | PseudoCAP category**                                                                                 |
|------------|------------|----------------------------|-------------------------------------------------------------|------------------------------------------------------------------------------------------------------|
| PA14_00060 | -          | ChIP, expression and motif | putative acyltransferase                                    | Fatty acid and phospholipid metabolism                                                               |
| PA14_02470 | pntB       | ChIP, expression and motif | pyridine nucleotide transhydrogenase, beta subunit          | Transport of small molecules; Energy metabolism                                                      |
| PA14_04690 | -          | ChIP, expression and motif | conserved hypothetical protein                              | Hypothetical, unclassified or unknown                                                                |
| PA14_09470 | phzB1      | ChIP, expression and motif | probable phenazine biosynthesis protein                     | Secreted factors (toxins, enzymes, alginate)                                                         |
| PA14_12130 | lis        | ChIP, expression and motif | Lipoate synthase                                            | Biosynthesis of cofactors, prosthetic groups and carriers                                            |
| PA14_17210 | lpxA       | ChIP, expression and motif | UDP-N-acetylglucosamine acetyltransferase                   | Cell wall / LPS / capsule                                                                            |
| PA14_17270 | accA       | ChIP, expression and motif | acetyl-CoA carboxylase, carboxyl transferase, alpha subunit | Fatty acid and phospholipid metabolism                                                               |
| PA14_25650 | fabD       | ChIP, expression and motif | malonyl-CoA-[acyl-carrier-protein] transacylase             | Fatty acid and phospholipid metabolism                                                               |
| PA14_25900 | -          | ChIP, expression and motif | putative short-chain alcohol dehydrogenase                  | Putative enzymes; Protein secretion / Export apparatus; Motility / Attachment                        |
| PA14_30990 | -          | ChIP, expression and motif | hypothetical                                                | Hypothetical, unclassified or unknown                                                                |
| PA14_31360 | -          | ChIP, expression and motif | hypothetical protein                                        | Hypothetical, unclassified or unknown                                                                |
| PA14_33680 | fpvA       | ChIP, expression and motif | ferripyoverdine receptor                                    | Transport of small molecules                                                                         |
| PA14_39960 | phzB2      | ChIP, expression and motif | probable phenazine biosynthesis protein                     | Secreted factors (toxins, enzymes, alginate)                                                         |
| PA14_40560 | -          | ChIP, expression and motif | conserved hypothetical protein                              | Hypothetical, unclassified or unknown                                                                |
| PA14_41575 | sigX       | ChIP, expression and motif | ECF sigma factor SigX                                       | Transcriptional regulators                                                                           |
| PA14_41590 | cmpX*      | ChIP, expression and motif | putative cytoplasmic membrane protein                       | Membrane proteins                                                                                    |
| PA14_41610 | crfX*      | ChIP, expression and motif | conserved hypothetical protein                              | Hypothetical, unclassified or unknown                                                                |
| PA14_42380 | exsD*      | ChIP, expression and motif | conserved hypothetical protein                              | Hypothetical, unclassified or unknown                                                                |
| PA14_43690 | fabB       | ChIP, expression and motif | beta-ketoacyl-ACP synthase I                                | Fatty acid and phospholipid metabolism                                                               |
| PA14_46520 | -          | ChIP, expression and motif | hypothetical protein                                        | Hypothetical, unclassified or unknown                                                                |
| PA14_58990 | -          | ChIP, expression and motif | Putative DNA helicase                                       | Putative enzymes                                                                                     |
| PA14_59320 | pilS2      | ChIP, expression and motif | type IV B pilus protein                                     | Motility / Attachment                                                                                |
| PA14_59340 | pilT2      | ChIP, expression and motif | type IV B pilus protein                                     | Motility / Attachment                                                                                |
| PA14_62130 | ilvC       | ChIP, expression and motif | ketol-acid reductoisomerase                                 | Biosynthesis of cofactors, prosthetic groups and carriers; Amino acid biosynthesis and metabolism    |
| PA14_64090 | aroQ1      | ChIP, expression and motif | 3-dehydroquinate dehydratase                                | Amino acid biosynthesis and metabolism                                                               |
| PA14_64110 | accC       | ChIP, expression and motif | biotin carboxylase                                          | Fatty acid and phospholipid metabolism                                                               |
| PA14_64530 | -          | ChIP, expression and motif | hypothetical protein                                        | Hypothetical, unclassified or unknown                                                                |
| PA14_68360 | -          | ChIP, expression and motif | putative beta-ketoacyl synthase                             | Fatty acid and phospholipid metabolism                                                               |
| PA14_72110 | -          | ChIP, expression and motif | conserved hypothetical protein                              | Hypothetical, unclassified or unknown                                                                |
| PA14_00070 | -          | ChIP, expression           | putative histidinol-phosphatase                             | Transport of small molecules                                                                         |
| PA14_01240 | -          | ChIP, expression           | probable carbonic anhydrase                                 | Adaptation / Protection; Central intermediary metabolism                                             |
| PA14_01290 | coxB       | ChIP, expression           | cytochrome c oxidase, subunit II                            | Energy metabolism                                                                                    |
| PA14_02020 | -          | ChIP, expression           | putative outer membrane porin                               | Membrane proteins; Transport of small molecules                                                      |
| PA14_02460 | pntAB*     | ChIP, expression           | putative NAD(P) transhydrogenase, subunit alpha part 2      | Energy metabolism                                                                                    |
| PA14_03070 | pobR*      | ChIP, expression           | putative transcriptional regulator                          | Transcriptional regulators                                                                           |
| PA14_03160 | -          | ChIP, expression           | hypothetical protein                                        | Hypothetical, unclassified or unknown                                                                |
| PA14_03170 | -          | ChIP, expression           | conserved hypothetical protein                              | Related to phage, transposon or plasmid                                                              |
| PA14_03265 | -          | ChIP, expression           | hypothetical protein                                        | Hypothetical, unclassified or unknown                                                                |
| PA14_03270 | -          | ChIP, expression           | conserved hypothetical protein                              | Hypothetical, unclassified or unknown                                                                |
| PA14_04680 | -          | ChIP, expression           | putative phosphate acyltransferase                          | Fatty acid and phospholipid metabolism                                                               |
| PA14_05460 | bioA       | ChIP, expression           | adenosylmethionine-8-amino-7-oxononanoate aminotransferase  | Biosynthesis of cofactors, prosthetic groups and carriers                                            |
| PA14_05530 | mexA       | ChIP, expression           | RND multidrug efflux membrane fusion protein MexA precursor | Transport of small molecules; Antibiotic resistance and susceptibility                               |
| PA14_06500 | bioB       | ChIP, expression           | biotin synthase                                             | Biosynthesis of cofactors, prosthetic groups and carriers                                            |
| PA14_08560 | tyrZ       | ChIP, expression           | tyrosyl-tRNA synthetase 2                                   | Amino acid biosynthesis and metabolism; Translation, post-translational modification and degradation |
| PA14_09460 | phzC1      | ChIP, expression           | phenazine biosynthesis protein PhzC                         | Secreted factors (toxins, enzymes, alginate)                                                         |
| PA14_14630 | secD       | ChIP, expression           | protein-export membrane protein SecD                        | Membrane proteins; Protein secretion / Export apparatus                                              |
| PA14_15350 | -          | ChIP, expression           | putative integrase                                          | Related to phage, transposon or plasmid                                                              |
| PA14_15430 | tnpR*      | ChIP, expression           | putative resolvase, essential for transposition             | Related to phage, transposon or plasmid; DNA replication, recombination, modification and repair     |
| PA14_15770 | -          | ChIP, expression           | conserved hypothetical protein                              | Hypothetical, unclassified or unknown                                                                |
| PA14_19370 | asnB*      | ChIP, expression           | putative asparagine synthetase, glutamine-hydrolyzing       | Amino acid biosynthesis and metabolism                                                               |
| PA14_20750 | -          | ChIP, expression           | putative chemotaxis signal transduction protein             | Adaptation / Protection; Chemotaxis                                                                  |
| PA14_21020 | -          | ChIP, expression           | putative non-ribosomal peptide synthetase                   | Biosynthesis of cofactors, prosthetic groups and carriers; Adaptation / Protection                   |
| PA14_21030 | -          | ChIP, expression           | putative ATP-dependent Clp protease proteolytic subunit     | Translation, post-translational modification and degradation; Cell wall / LPS / capsule              |
| PA14_21540 | fabH-2*    | ChIP, expression           | putative 3-oxoacyl-(acyl-carrier-protein) synthase III      | Fatty acid and phospholipid metabolism                                                               |
| PA14_21750 | -          | ChIP, expression           | putative acetyltransferase                                  | Fatty acid and phospholipid metabolism; Membrane proteins                                            |
| PA14_23330 | rpsA       | ChIP, expression           | 30S ribosomal protein S1                                    | Translation, post-translational modification and degradation                                         |
| PA14_23500 | tyrB       | ChIP, expression           | putative amino acid aminotransferase                        | Amino acid biosynthesis and metabolism; Putative enzymes                                             |
| PA14_29300 | -          | ChIP, expression           | putative transcriptional regulator                          | Transcriptional regulators                                                                           |
| PA14_30970 | bphR*      | ChIP, expression           | putative transcriptional regulator                          | Transcriptional regulators                                                                           |
| PA14_30980 | -          | ChIP, expression           | hypothetical                                                | Hypothetical, unclassified or unknown                                                                |
| PA14_31000 | -          | ChIP, expression           | hypothetical                                                | Related to phage, transposon or plasmid                                                              |
| PA14_31350 | -          | ChIP, expression           | conserved hypothetical protein                              | Hypothetical, unclassified or unknown                                                                |
| PA14_31420 | -          | ChIP, expression           | hypothetical protein                                        | Hypothetical, unclassified or unknown                                                                |
| PA14_31700 | pgsA*      | ChIP, expression           | CDP-alcohol phosphatidyltransferase                         | Fatty acid and phospholipid metabolism; Putative enzymes                                             |
| PA14_33600 | -          | ChIP, expression           | putative iron-regulated membrane protein                    | Membrane proteins                                                                                    |

|            |       |                   |                                                                                             |                                                                                           |
|------------|-------|-------------------|---------------------------------------------------------------------------------------------|-------------------------------------------------------------------------------------------|
| PA14_33610 | -     | ChIP, expression  | probable non-ribosomal peptide synthetase                                                   | Putative enzymes                                                                          |
| PA14_37690 | -     | ChIP, expression  | putative sensory box protein                                                                | Two-component regulatory systems; Membrane proteins                                       |
| PA14_39945 | phzC2 | ChIP, expression  | phenazine biosynthesis protein PhzC                                                         | Hypothetical, unclassified or unknown                                                     |
| PA14_41300 | -     | ChIP, expression  | hypothetical protein                                                                        | Hypothetical, unclassified or unknown                                                     |
| PA14_42390 | exsA  | ChIP, expression  | transcriptional regulator ExsA                                                              | Protein secretion / Export apparatus; Transcriptional regulators                          |
| PA14_42860 | -     | ChIP, expression  | putative hemerythrin                                                                        | Transport of small molecules                                                              |
| PA14_43680 | fabA  | ChIP, expression  | beta-hydroxydecanoyl-ACP dehydrase                                                          | Fatty acid and phospholipid metabolism                                                    |
| PA14_44300 | aer   | ChIP, expression  | aerotaxis receptor Aer                                                                      | Adaptation / Protection; Chemotaxis                                                       |
| PA14_45940 | lasI  | ChIP, expression  | autoinducer synthesis protein LasI                                                          | Adaptation / Protection                                                                   |
| PA14_45960 | lasR  | ChIP, expression  | transcriptional regulator LasR                                                              | Adaptation / Protection; Transcriptional regulators                                       |
| PA14_46510 | -     | ChIP, expression  | hypothetical protein                                                                        | Hypothetical, unclassified or unknown                                                     |
| PA14_48880 | intT* | ChIP, expression  | putative bacteriophage integrase                                                            | Putative enzymes; Related to phage, transposon or plasmid                                 |
| PA14_50290 | fliC  | ChIP, expression  | flagellin type B                                                                            | Motility / Attachment                                                                     |
| PA14_50740 | -     | ChIP, expression  | conserved hypothetical protein                                                              | Membrane proteins                                                                         |
| PA14_51300 | perM* | ChIP, expression  | conserved hypothetical protein                                                              | Membrane proteins                                                                         |
| PA14_51310 | yrkI* | ChIP, expression  | conserved hypothetical protein                                                              | Hypothetical, unclassified or unknown                                                     |
| PA14_51430 | pqsA  | ChIP, expression  | probable coenzyme A ligase                                                                  | Biosynthesis of cofactors, prosthetic groups and carriers                                 |
| PA14_51750 | tolQ  | ChIP, expression  | TolQ protein                                                                                | Membrane proteins; Transport of small molecules                                           |
| PA14_51770 | ybgC* | ChIP, expression  | conserved hypothetical protein                                                              | Hypothetical, unclassified or unknown                                                     |
| PA14_51880 | oprD  | ChIP, expression  | Basic amino acid, basic peptide and imipenem outer membrane porin OprD precursor            | Transport of small molecules                                                              |
| PA14_51930 | helX* | ChIP, expression  | probable thioredoxin                                                                        | Putative enzymes                                                                          |
| PA14_51960 | rbn*  | ChIP, expression  | probable ribonuclease                                                                       | Transcription, RNA processing and degradation                                             |
| PA14_52070 | -     | ChIP, expression  | probable transcriptional regulator                                                          | Transcriptional regulators                                                                |
| PA14_53910 | pmtA  | ChIP, expression  | phospholipid methyltransferase                                                              | Fatty acid and phospholipid metabolism                                                    |
| PA14_54860 | -     | ChIP, expression  | hypothetical protein                                                                        | Hypothetical, unclassified or unknown                                                     |
| PA14_54880 | -     | ChIP, expression  | putative serine acetyltransferase                                                           | Putative enzymes                                                                          |
| PA14_54910 | -     | ChIP, expression  | putative thioesterase                                                                       | Putative enzymes                                                                          |
| PA14_54920 | -     | ChIP, expression  | putative non-ribosomal peptide synthetase                                                   | Putative enzymes                                                                          |
| PA14_54970 | -     | ChIP, expression  | possible ABC transporter protein                                                            | Transport of small molecules                                                              |
| PA14_55000 | -     | ChIP, expression  | possible ABC-type transporter, periplasmic component                                        | Transport of small molecules                                                              |
| PA14_55390 | -     | ChIP, expression  | hypothetical protein                                                                        | Hypothetical, unclassified or unknown                                                     |
| PA14_55400 | -     | ChIP, expression  | hypothetical protein                                                                        | Hypothetical, unclassified or unknown                                                     |
| PA14_55960 | pctC  | ChIP, expression  | chemotactic transducer PctC                                                                 | Adaptation / Protection; Chemotaxis                                                       |
| PA14_56060 | purU  | ChIP, expression  | formyltetrahydrofolate deformylase                                                          | Nucleotide biosynthesis and metabolism                                                    |
| PA14_57690 | -     | ChIP, expression  | conserved hypothetical protein                                                              | Hypothetical, unclassified or unknown                                                     |
| PA14_57880 | -     | ChIP, expression  | putative toluene tolerance ABC efflux transporter                                           | Membrane proteins; Transport of small molecules                                           |
| PA14_58730 | pilA  | ChIP, expression  | type IV pilin structural subunit                                                            | Motility / Attachment                                                                     |
| PA14_58950 | -     | ChIP, expression  | conserved hypothetical protein                                                              | Hypothetical, unclassified or unknown                                                     |
| PA14_59090 | -     | ChIP, expression  | conserved hypothetical protein                                                              | Hypothetical, unclassified or unknown                                                     |
| PA14_59710 | cupD1 | ChIP, expression  | putative fimbrial protein precursor                                                         | Motility / Attachment                                                                     |
| PA14_59970 | -     | ChIP, expression  | conserved hypothetical protein                                                              | Hypothetical, unclassified or unknown                                                     |
| PA14_61040 | katB  | ChIP, expression  | catalase                                                                                    | Adaptation / Protection                                                                   |
| PA14_61200 | -     | ChIP, expression  | conserved hypothetical protein                                                              | Secreted factors (toxins, enzymes, alginate); Cell wall / LPS / capsule                   |
| PA14_61600 | -     | ChIP, expression  | putative oxidoreductase                                                                     | Putative enzymes                                                                          |
| PA14_64100 | accB  | ChIP, expression  | biotin carboxyl carrier protein                                                             | Fatty acid and phospholipid metabolism                                                    |
| PA14_66660 | pilM  | ChIP, expression  | type 4 fimbrial biogenesis protein PilM                                                     | Motility / Attachment                                                                     |
| PA14_69170 | -     | ChIP, expression  | putative acyltransferase                                                                    | Putative enzymes; Membrane proteins; Cell wall / LPS / capsule                            |
| PA14_71650 | aspA  | ChIP, expression  | aspartate ammonia-lyase                                                                     | Amino acid biosynthesis and metabolism                                                    |
| PA14_72070 | -     | ChIP, expression  | conserved hypothetical protein                                                              | Hypothetical, unclassified or unknown                                                     |
| PA14_72080 | -     | ChIP, expression  | conserved hypothetical protein                                                              | Hypothetical, unclassified or unknown                                                     |
| PA14_72800 | rosB* | ChIP, expression  | putative potassium efflux protein                                                           | Membrane proteins; Transport of small molecules                                           |
| PA14_72810 | -     | ChIP, expression  | putative acyl-CoA thioester hydrolase                                                       | Fatty acid and phospholipid metabolism                                                    |
| PA14_73140 | -     | ChIP, expression  | putative cyclopropan-fatty-acyl-phospholipid synthase                                       | Fatty acid and phospholipid metabolism; Putative enzymes                                  |
| PA14_00480 | -     | expression, motif | conserved hypothetical protein                                                              | Hypothetical, unclassified or unknown                                                     |
| PA14_01200 | -     | expression, motif | Hypothetical protein                                                                        | Hypothetical, unclassified or unknown                                                     |
| PA14_01250 | ychM* | expression, motif | putative sulfate transporter                                                                | Membrane proteins; Transport of small molecules                                           |
| PA14_04710 | -     | expression, motif | hypothetical protein                                                                        | Hypothetical, unclassified or unknown                                                     |
| PA14_05450 | -     | expression, motif | conserved hypothetical protein                                                              | Hypothetical, unclassified or unknown                                                     |
| PA14_05540 | mexB  | expression, motif | RND multidrug efflux transporter MexB                                                       | Transport of small molecules; Membrane proteins; Antibiotic resistance and susceptibility |
| PA14_05550 | oprM  | expression, motif | major intrinsic multiple antibiotic resistance efflux outer membrane protein OprM precursor | Antibiotic resistance and susceptibility; Membrane proteins; Transport of small molecules |
| PA14_05810 | amaB  | expression, motif | N-carbamoyl-beta-alanine amidohydrolase                                                     | Nucleotide biosynthesis and metabolism                                                    |
| PA14_05920 | -     | expression, motif | putative membrane protein                                                                   | Membrane proteins                                                                         |
| PA14_06510 | bioF  | expression, motif | 8-amino-7-oxononanoate synthase                                                             | Biosynthesis of cofactors, prosthetic groups and carriers                                 |
| PA14_06570 | bioD  | expression, motif | dethiobiotin synthase                                                                       | Biosynthesis of cofactors, prosthetic groups and carriers                                 |
| PA14_06670 | nirJ  | expression, motif | heme d1 biosynthesis protein NirJ                                                           | Biosynthesis of cofactors, prosthetic groups and carriers; Energy metabolism              |
| PA14_06740 | nirM  | expression, motif | cytochrome c-551 precursor                                                                  | Biosynthesis of cofactors, prosthetic groups and carriers; Energy metabolism              |
| PA14_07530 | dnaG  | expression, motif | putative DNA primase                                                                        | DNA replication, recombination, modification and repair                                   |
| PA14_08150 | gpD*  | expression, motif | putative phage late control gene D protein                                                  | Related to phage, transposon or plasmid                                                   |
| PA14_08300 | JF1*  | expression, motif | putative phage-related protein, tail component                                              | Related to phage, transposon or plasmid                                                   |
| PA14_08750 | rpL   | expression, motif | 50S ribosomal protein L7 / L12                                                              | Translation, post-translational modification and degradation                              |

|            |       |                   |                                                                 |                                                                                                  |
|------------|-------|-------------------|-----------------------------------------------------------------|--------------------------------------------------------------------------------------------------|
| PA14_08820 | fusA1 | expression, motif | elongation factor G                                             | Translation, post-translational modification and degradation                                     |
| PA14_08990 | rpsH  | expression, motif | 30S ribosomal protein S8                                        | Translation, post-translational modification and degradation                                     |
| PA14_09130 | rplQ  | expression, motif | 50S ribosomal protein L17                                       | Translation, post-translational modification and degradation                                     |
| PA14_09400 | phzS  | expression, motif | flavin-containing monooxygenase                                 | Putative enzymes                                                                                 |
| PA14_09440 | phzE1 | expression, motif | phenazine biosynthesis protein PhzE                             | Secreted factors (toxins, enzymes, alginate)                                                     |
| PA14_09450 | phzD1 | expression, motif | phenazine biosynthesis protein PhzD                             | Secreted factors (toxins, enzymes, alginate)                                                     |
| PA14_09520 | mexI  | expression, motif | probable RND efflux transporter                                 | Membrane proteins; Transport of small molecules                                                  |
| PA14_09530 | mexH  | expression, motif | RND efflux membrane fusion protein precursor                    | Transport of small molecules                                                                     |
| PA14_10240 | acoC* | expression, motif | putative hydrolase                                              | Carbon compound catabolism                                                                       |
| PA14_10500 | ccoN* | expression, motif | cytochrome c oxidase subunit (ccb3-type)                        | Energy metabolism                                                                                |
| PA14_10530 | -     | expression, motif | putative transcriptional regulator, GntR family                 | Transcriptional regulators                                                                       |
| PA14_11070 | cupB2 | expression, motif | chaperone CupB2                                                 | Motility / Attachment; Chaperones / Heat shock proteins                                          |
| PA14_11110 | cupB6 | expression, motif | fimbrial protein cupB6                                          | Motility / Attachment                                                                            |
| PA14_12550 | -     | expression, motif | hypothetical protein                                            | Hypothetical, unclassified or unknown                                                            |
| PA14_13840 | -     | expression, motif | putative peptidyl-prolyl cis-trans isomerase                    | Translation, post-translational modification and degradation; Chaperones / Heat shock proteins   |
| PA14_14650 | secF  | expression, motif | protein-export membrane protein SecF                            | Protein secretion / Export apparatus                                                             |
| PA14_15340 | guaA  | expression, motif | GMP synthase                                                    | Amino acid biosynthesis and metabolism; Nucleotide biosynthesis and metabolism                   |
| PA14_15445 | merE  | expression, motif | Hypothetical mercuric resistance protein merE                   | Hypothetical, unclassified or unknown                                                            |
| PA14_15450 | merD  | expression, motif | Mercuric resistance transcriptional repressor protein MerD      | Transcriptional regulators                                                                       |
| PA14_16180 | -     | expression, motif | conserved hypothetical protein                                  | Hypothetical, unclassified or unknown                                                            |
| PA14_16820 | -     | expression, motif | putative efflux transmembrane protein                           | Antibiotic resistance and susceptibility; Membrane proteins; Transport of small molecules        |
| PA14_17070 | tsf   | expression, motif | translation elongation factor Ts                                | Translation, post-translational modification and degradation                                     |
| PA14_17100 | frr   | expression, motif | ribosome recycling factor                                       | Translation, post-translational modification and degradation                                     |
| PA14_17630 | potB  | expression, motif | polyamine transport protein PotB                                | Membrane proteins; Transport of small molecules                                                  |
| PA14_17960 | glpK  | expression, motif | glycerol kinase                                                 | Central intermediary metabolism                                                                  |
| PA14_18010 | glpK* | expression, motif | putative glycerol kinase                                        | Central intermediary metabolism; Putative enzymes                                                |
| PA14_18430 | algJ  | expression, motif | alginate o-acetyltransferase AlgJ                               | Cell wall / LPS / capsule; Adaptation / Protection; Secreted factors (toxins, enzymes, alginate) |
| PA14_18830 | -     | expression, motif | putative lyase                                                  | Carbon compound catabolism                                                                       |
| PA14_18860 | -     | expression, motif | conserved hypothetical protein                                  | Hypothetical, unclassified or unknown                                                            |
| PA14_19360 | -     | expression, motif | putative acetyltransferase, GNAT family                         | Putative enzymes                                                                                 |
| PA14_20760 | cheR* | expression, motif | putative chemotaxis protein methyltransferase                   | Adaptation / Protection; Chemotaxis                                                              |
| PA14_20940 | -     | expression, motif | putative acyl carrier protein                                   | Fatty acid and phospholipid metabolism                                                           |
| PA14_20970 | cyp23 | expression, motif | cytochrome P450                                                 | Adaptation / Protection; Carbon compound catabolism                                              |
| PA14_21000 | -     | expression, motif | hypothetical protein                                            | Hypothetical, unclassified or unknown                                                            |
| PA14_21010 | -     | expression, motif | putative FAD-dependent monooxygenase                            | Energy metabolism; Putative enzymes                                                              |
| PA14_21600 | -     | expression, motif | putative membrane protein                                       | Membrane proteins                                                                                |
| PA14_22520 | -     | expression, motif | hypothetical protein                                            | Hypothetical, unclassified or unknown                                                            |
| PA14_22530 | gst2* | expression, motif | putative glutathione S-transferase                              | Translation, post-translational modification and degradation                                     |
| PA14_22910 | edd   | expression, motif | 6-phosphogluconate dehydratase                                  | Energy metabolism; Carbon compound catabolism                                                    |
| PA14_23090 | edaA* | expression, motif | 2-keto-3-deoxy-6-phosphogluconate aldolase                      | Central intermediary metabolism; Carbon compound catabolism                                      |
| PA14_24010 | xcpS  | expression, motif | general secretion pathway protein F                             | Protein secretion / Export apparatus                                                             |
| PA14_24020 | xcpT  | expression, motif | general secretion pathway protein G                             | Protein secretion / Export apparatus                                                             |
| PA14_24300 | -     | expression, motif | conserved hypothetical protein                                  | Hypothetical, unclassified or unknown                                                            |
| PA14_24390 | -     | expression, motif | putative TPR domain protein                                     | Putative enzymes                                                                                 |
| PA14_25660 | fabG  | expression, motif | 3-oxoacyl-[acyl-carrier-protein] reductase                      | Fatty acid and phospholipid metabolism                                                           |
| PA14_25670 | acpP  | expression, motif | acyl carrier protein                                            | Fatty acid and phospholipid metabolism                                                           |
| PA14_25730 | -     | expression, motif | putative aminodeoxychormistate lyase                            | Putative enzymes                                                                                 |
| PA14_25740 | tmk   | expression, motif | thymidylate kinase                                              | Nucleotide biosynthesis and metabolism                                                           |
| PA14_26700 | -     | expression, motif | putative acyl-CoA dehydrogenase                                 | Fatty acid and phospholipid metabolism; Putative enzymes                                         |
| PA14_26810 | -     | expression, motif | putative two-component sensor histidine kinase                  | Two-component regulatory systems                                                                 |
| PA14_30850 | trbI* | expression, motif | TrbI-like protein                                               | Related to phage, transposon or plasmid                                                          |
| PA14_30860 | trbG* | expression, motif | TrbG-like protein                                               | Related to phage, transposon or plasmid                                                          |
| PA14_31720 | -     | expression, motif | putative lysophospholipase                                      | Fatty acid and phospholipid metabolism                                                           |
| PA14_31730 | -     | expression, motif | putative dual specificity phosphatase                           | Putative enzymes; Membrane proteins                                                              |
| PA14_31740 | -     | expression, motif | hypothetical protein                                            | Membrane proteins                                                                                |
| PA14_31760 | cdsA* | expression, motif | putative phosphatidate cytidyltransferase                       | Fatty acid and phospholipid metabolism                                                           |
| PA14_32130 | benD  | expression, motif | cis-1,2-dihydroxycyclohexa-3,4-diene carboxylate dehydrogenase  | Carbon compound catabolism                                                                       |
| PA14_32390 | mexF  | expression, motif | RND multidrug efflux transporter MexF                           | Transport of small molecules; Membrane proteins; Antibiotic resistance and susceptibility        |
| PA14_33500 | pvdH  | expression, motif | L-2,4-diaminobutyrate:2-ketoglutarate 4-aminotransferase, PvdH  | Adaptation / Protection                                                                          |
| PA14_33530 | -     | expression, motif | putative ABC transporter, periplasmic substrate-binding protein | Motility / Attachment                                                                            |
| PA14_33550 | -     | expression, motif | putative ATP-binding component of ABC transporter               | Transport of small molecules                                                                     |
| PA14_33570 | -     | expression, motif | conserved hypothetical protein                                  | Hypothetical, unclassified or unknown                                                            |
| PA14_33650 | pvdD  | expression, motif | pyoverdine synthetase D                                         | Secreted factors (toxins, enzymes, alginate); Adaptation / Protection                            |
| PA14_36070 | -     | expression, motif | putative enzyme                                                 | Putative enzymes                                                                                 |
| PA14_39690 | nrdD* | expression, motif | putative ribonucleotide reductase                               | Nucleotide biosynthesis and metabolism                                                           |
| PA14_39910 | phzE2 | expression, motif | phenazine biosynthesis protein PhzE                             | Secreted factors (toxins, enzymes, alginate)                                                     |
| PA14_39925 | phzD2 | expression, motif | phenazine biosynthesis protein PhzD                             | Hypothetical, unclassified or unknown                                                            |
| PA14_42260 | pscK  | expression, motif | PscK type III export protein                                    | Secreted factors (toxins, enzymes, alginate); Protein secretion / Export apparatus               |
| PA14_42290 | pscH  | expression, motif | type III export protein PscH                                    | Protein secretion / Export apparatus                                                             |
| PA14_42300 | pscG  | expression, motif | type III export protein PscG                                    | Protein secretion / Export apparatus; Chaperones / Heat shock proteins                           |



|            |         |                   |                                                          |                                                                                                                                                  |
|------------|---------|-------------------|----------------------------------------------------------|--------------------------------------------------------------------------------------------------------------------------------------------------|
| PA14_42350 | pscC    | expression, motif | Type III secretion outer membrane protein PscC precursor | Protein secretion / Export apparatus                                                                                                             |
| PA14_42430 | exsC    | expression, motif | exoenzyme S synthesis protein C precursor                | Secreted factors (toxins, enzymes, alginate); Translation, post-translational modification and degradation; Protein secretion / Export apparatus |
| PA14_42460 | pcrH    | expression, motif | regulatory protein PcrH                                  | Secreted factors (toxins, enzymes, alginate); Protein secretion / Export apparatus                                                               |
| PA14_43020 | -       | expression, motif | conserved hypothetical protein                           | Protein secretion / Export apparatus                                                                                                             |
| PA14_43030 | -       | expression, motif | conserved hypothetical protein                           | Protein secretion / Export apparatus                                                                                                             |
| PA14_43350 | kdpD    | expression, motif | two-component sensor KdpD                                | Two-component regulatory systems                                                                                                                 |
| PA14_43380 | kdpB    | expression, motif | potassium-transporting ATPase, B chain                   | Transport of small molecules                                                                                                                     |
| PA14_43670 | -       | expression, motif | putative sensor/response regulator hybrid                | Transcriptional regulators; Two-component regulatory systems; Cell wall / LPS / capsule; Motility / Attachment; Chemotaxis                       |
| PA14_43710 | -       | expression, motif | putative methyl-accepting chemotaxis transducer          | Adaptation / Protection; Chemotaxis                                                                                                              |
| PA14_43970 | lpdG    | expression, motif | lipoamide dehydrogenase-glc                              | Amino acid biosynthesis and metabolism; Energy metabolism                                                                                        |
| PA14_44350 | ccoO*   | expression, motif | putative cytochrome c oxidase subunit                    | Energy metabolism                                                                                                                                |
| PA14_44360 | ccoP*   | expression, motif | putative cytochrome c oxidase, cbb3-type, subunit III    | Energy metabolism                                                                                                                                |
| PA14_45010 | hyi*    | expression, motif | putative hydroxypyruvate isomerase                       | Central intermediary metabolism                                                                                                                  |
| PA14_45020 | glxR*   | expression, motif | putative oxidoreductase                                  | Putative enzymes                                                                                                                                 |
| PA14_45050 | pykF    | expression, motif | pyruvate kinase I                                        | Energy metabolism; Carbon compound catabolism                                                                                                    |
| PA14_48710 | -       | expression, motif | conserved hypothetical protein                           | Hypothetical, unclassified or unknown                                                                                                            |
| PA14_48950 | -       | expression, motif | hypothetical protein of bacteriophage Pf1                | Related to phage, transposon or plasmid                                                                                                          |
| PA14_49160 | yegE*   | expression, motif | conserved hypothetical protein                           | Membrane proteins                                                                                                                                |
| PA14_49470 | nrdB    | expression, motif | ribonucleoside reductase, small chain                    | Nucleotide biosynthesis and metabolism                                                                                                           |
| PA14_50250 | fljS    | expression, motif | hypothetical protein                                     | Hypothetical, unclassified or unknown                                                                                                            |
| PA14_50270 | fljD    | expression, motif | flagellar capping protein FljD                           | Cell wall / LPS / capsule; Motility / Attachment                                                                                                 |
| PA14_50710 | phaD    | expression, motif | probable NADH dehydrogenase                              | Membrane proteins; Putative enzymes                                                                                                              |
| PA14_51040 | -       | expression, motif | probable oxidoreductase                                  | Putative enzymes                                                                                                                                 |
| PA14_51390 | pqsD    | expression, motif | 3-oxoacyl-[acyl-carrier-protein] synthase III            | Biosynthesis of cofactors, prosthetic groups and carriers                                                                                        |
| PA14_51720 | tolB    | expression, motif | TolB protein                                             | Transport of small molecules                                                                                                                     |
| PA14_51730 | tolA    | expression, motif | TolA protein                                             | Membrane proteins; Transport of small molecules                                                                                                  |
| PA14_55300 | -       | expression, motif | hypothetical protein                                     | Hypothetical, unclassified or unknown                                                                                                            |
| PA14_55540 | -       | expression, motif | probable transmembrane sensor                            | Membrane proteins; Transcriptional regulators                                                                                                    |
| PA14_56050 | -       | expression, motif | putative membrane protein                                | Membrane proteins                                                                                                                                |
| PA14_57830 | -       | expression, motif | conserved hypothetical protein                           | Hypothetical, unclassified or unknown                                                                                                            |
| PA14_57840 | ttg2D*  | expression, motif | putative toluene tolerance protein                       | Adaptation / Protection                                                                                                                          |
| PA14_58190 | gatB    | expression, motif | Glu-tRNA(Gln) amidotransferase subunit B                 | Translation, post-translational modification and degradation                                                                                     |
| PA14_59000 | -       | expression, motif | Conserved hypothetical protein                           | Hypothetical, unclassified or unknown                                                                                                            |
| PA14_59940 | -       | expression, motif | conserved hypothetical protein                           | Hypothetical, unclassified or unknown                                                                                                            |
| PA14_60700 | ccpR    | expression, motif | cytochrome c551 peroxidase                               | Energy metabolism                                                                                                                                |
| PA14_61610 | -       | expression, motif | conserved hypothetical protein                           | Hypothetical, unclassified or unknown                                                                                                            |
| PA14_61780 | rpIY*   | expression, motif | putative ribosomal protein L25                           | Adaptation / Protection; Translation, post-translational modification and degradation                                                            |
| PA14_61790 | pth     | expression, motif | peptidyl-tRNA hydrolase                                  | Translation, post-translational modification and degradation                                                                                     |
| PA14_62760 | infB    | expression, motif | translation initiation factor IF-2                       | Translation, post-translational modification and degradation                                                                                     |
| PA14_62770 | nusA    | expression, motif | N utilization substance protein A                        | Transcription, RNA processing and degradation                                                                                                    |
| PA14_62960 | dnaJ    | expression, motif | chaperone protein DnaJ                                   | DNA replication, recombination, modification and repair; Chaperones / Heat shock proteins; Adaptation / Protection                               |
| PA14_63210 | -       | expression, motif | putative two-component response regulator                | Two-component regulatory systems; Transcriptional regulators; Motility / Attachment; Cell wall / LPS / capsule                                   |
| PA14_63220 | -       | expression, motif | hypothetical protein                                     | Hypothetical, unclassified or unknown                                                                                                            |
| PA14_64050 | -       | expression, motif | putative two-component response regulator                | Transcriptional regulators; Two-component regulatory systems                                                                                     |
| PA14_66630 | pilP    | expression, motif | type 4 fimbrial biogenesis protein PilP                  | Motility / Attachment                                                                                                                            |
| PA14_66650 | pilN    | expression, motif | type 4 fimbrial biogenesis protein PilN                  | Motility / Attachment                                                                                                                            |
| PA14_66790 | hslU    | expression, motif | heat shock protein HslU                                  | Chaperones / Heat shock proteins                                                                                                                 |
| PA14_67300 | proX*   | expression, motif | putative binding protein component of ABC transporter    | Transport of small molecules                                                                                                                     |
| PA14_67450 | blc     | expression, motif | outer membrane lipoprotein Blc                           | Cell wall / LPS / capsule; Membrane proteins                                                                                                     |
| PA14_68210 | rmIC    | expression, motif | dTDP-4-dehydrorhamnose 3,5-epimerase                     | Cell wall / LPS / capsule                                                                                                                        |
| PA14_68440 | -       | expression, motif | putative oxidoreductase, molybdopterin-binding           | Energy metabolism; Putative enzymes                                                                                                              |
| PA14_70010 | -       | expression, motif | putative endoribonuclease L-PSP family protein           | Translation, post-translational modification and degradation                                                                                     |
| PA14_71260 | -       | expression, motif | putative oxidoreductase, FMN-binding                     | Energy metabolism; Amino acid biosynthesis and metabolism                                                                                        |
| PA14_71820 | yegQ*   | expression, motif | putative peptidase                                       | Translation, post-translational modification and degradation; Putative enzymes                                                                   |
| PA14_71890 | psecoA* | expression, motif | putative coenzyme A transferase                          | Fatty acid and phospholipid metabolism; Putative enzymes                                                                                         |
| PA14_72650 | -       | expression, motif | putative transcriptional regulator                       | Transcriptional regulators                                                                                                                       |
| PA14_72690 | -       | expression, motif | putative glutamine synthetase                            | Amino acid biosynthesis and metabolism; Putative enzymes; Carbon compound catabolism                                                             |
| PA14_72790 | -       | expression, motif | putative membrane protein                                | Membrane proteins                                                                                                                                |
| PA14_73170 | glmS    | expression, motif | glucosamine-fructose-6-phosphate aminotransferase        | Central intermediary metabolism                                                                                                                  |
| PA14_73240 | atpD    | expression, motif | ATP synthase beta chain                                  | Energy metabolism                                                                                                                                |
| PA1555.1   | ccoQ1   | expression, motif | -                                                        | Non-coding RNA gene (sRNA)                                                                                                                       |
| PA4704.1   | prfF1   | expression, motif | -                                                        | Non-coding RNA gene (sRNA)                                                                                                                       |

\* alternative gene name was provided when no gene name was annotated

\*\* PseudoCAP annotation was updated as previously described (see Material & Methods)
